# Supplementary material for: Construction of Zn-doped RuO2 nanowires for efficient and stable water oxidation in acidic media
Source: PubMed Central journal article supplement (PMC10154325; doi:10.1038/s41467-023-38213-1), 2023-05-02
Supplement: 41467_2023_38213_MOESM1_ESM.pdf [file 41467_2023_38213_MOESM1_ESM.pdf]

## Supplementary Information

### **Construction of Zn-doped RuO<sub>2</sub> nanowires for efficient and stable water oxidation in acidic media**

Dafeng Zhang<sup>1,5</sup>, Mengnan Li<sup>1,5</sup>, Xue Yong<sup>2,3,5</sup>, Haoqiang Song<sup>2</sup>, Geoffrey I.N. Waterhouse<sup>4</sup>, Yunfei Yi<sup>1</sup>, Bingjie Xue<sup>1</sup>, Dongliang Zhang<sup>1</sup>, Baozhong Liu<sup>1,\*</sup>, Siyu Lu<sup>2,\*</sup>

<sup>1</sup>State Collaborative Innovation Center of Coal Work Safety and Clean-efficiency Utilization, Henan Key Laboratory of Coal Green Conversion, College of Chemistry and Chemical Engineering, Henan Polytechnic University, Jiaozuo 454003, P. R. China.

<sup>2</sup>Green Catalysis Center, and College of Chemistry, Zhengzhou University, Zhengzhou 450000, P. R. China.

<sup>3</sup>Department of Chemistry, The University of Sheffield, Sheffield S3 7HF

<sup>4</sup>School of Chemical Sciences, The University of Auckland, Auckland 1142, New Zealand.

<sup>5</sup>These authors contributed equally: Dafeng Zhang, Mengnan Li, Xue Yong.

\*Corresponding authors.

E-mail: bzliu@hpu.edu.cn (Baozhong Liu), sylu2013@zzu.edu.cn (Siyu Lu)

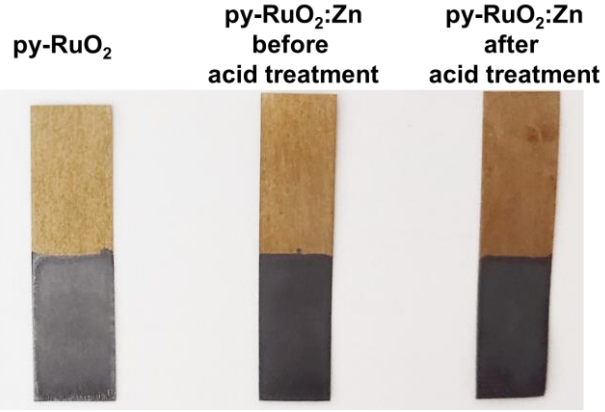

**Supplementary Fig. 1 | Photographs of py-RuO<sub>2</sub>, and py-RuO<sub>2</sub>:Zn electrodes before and after the acid treatment.**

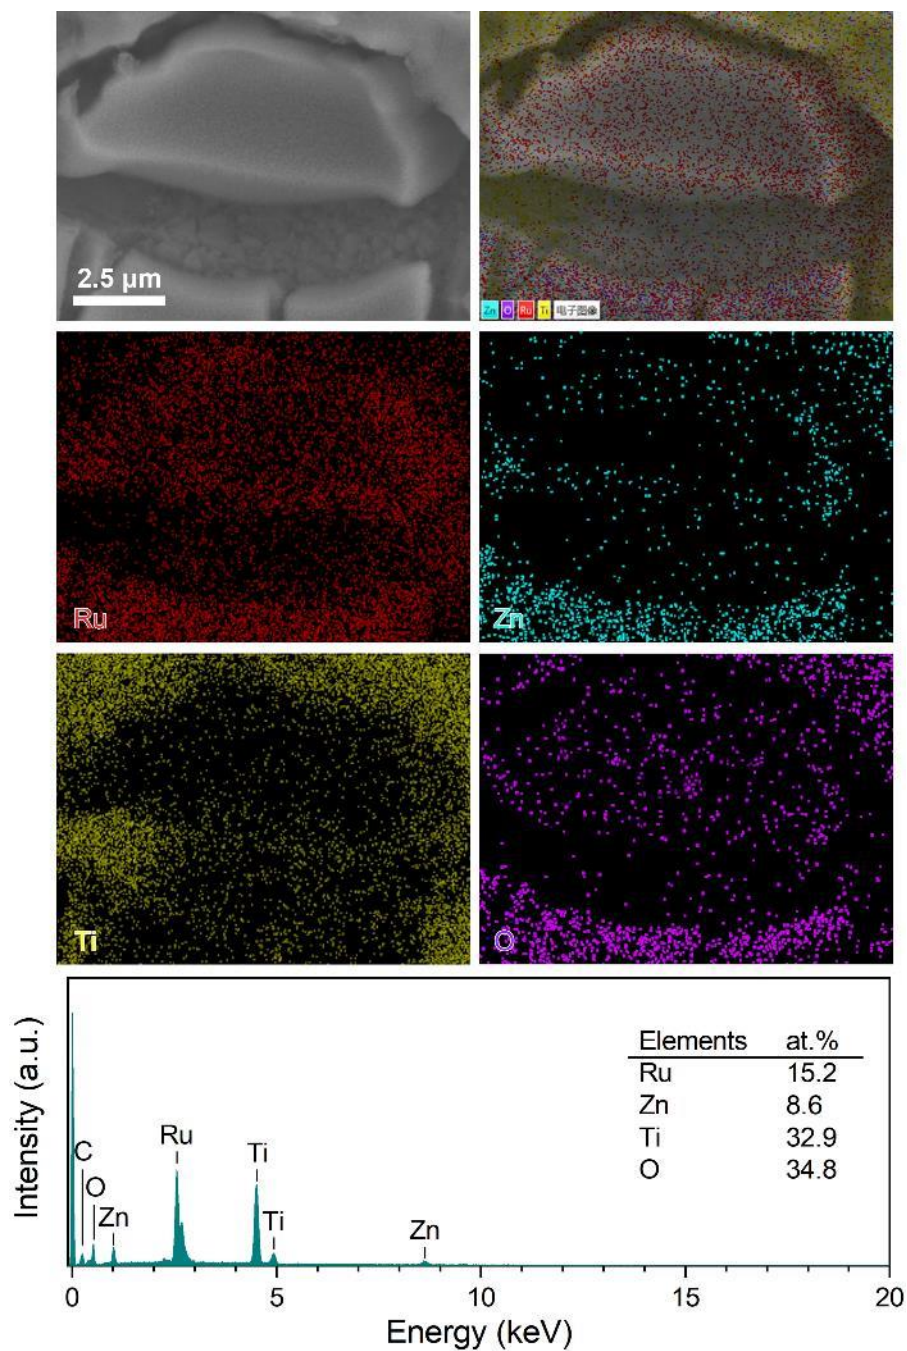

**Supplementary Fig. 2 | SEM image (top left) and corresponding EDS maps for Ru, Zn, Ti, and O elements in py-RuO<sub>2</sub>:Zn before the acid treatment. The atomic ratio of Zn:Ru is 0.57:1 determined from the EDS spectrum, close to the molar ratio in precursor (Zn:Ru = 0.5:1).**

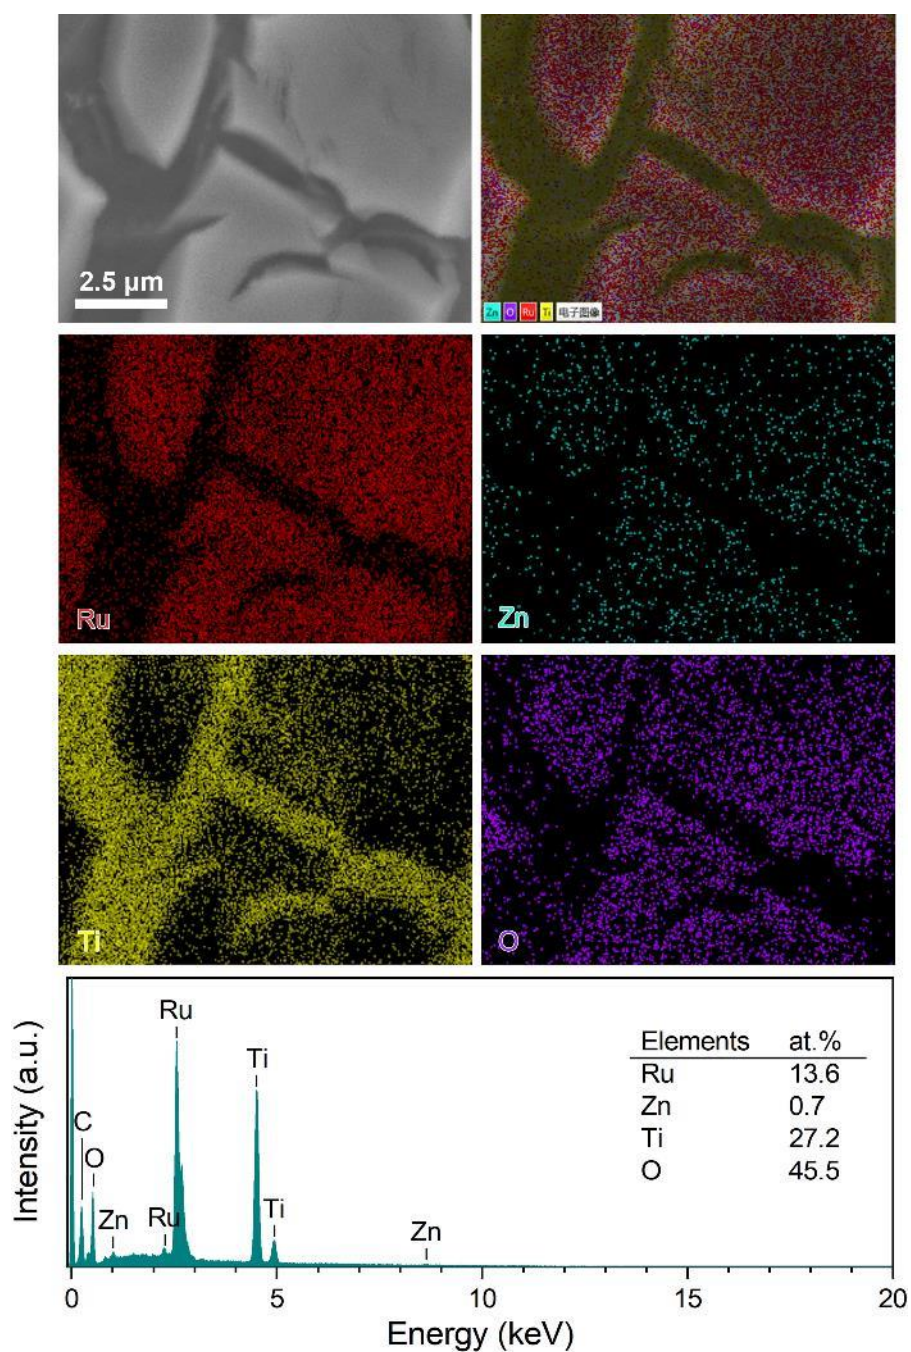

**Supplementary Fig. 3 | SEM image (top left) and corresponding EDS maps for Ru, Zn, Ti, and O elements in py-RuO<sub>2</sub>:Zn after the acid treatment. The atomic ratio of Zn:Ru is 0.0515:1 determined from EDS spectrum, close to the ICP-MS result (Zn:Ru = 0.0639:1).**

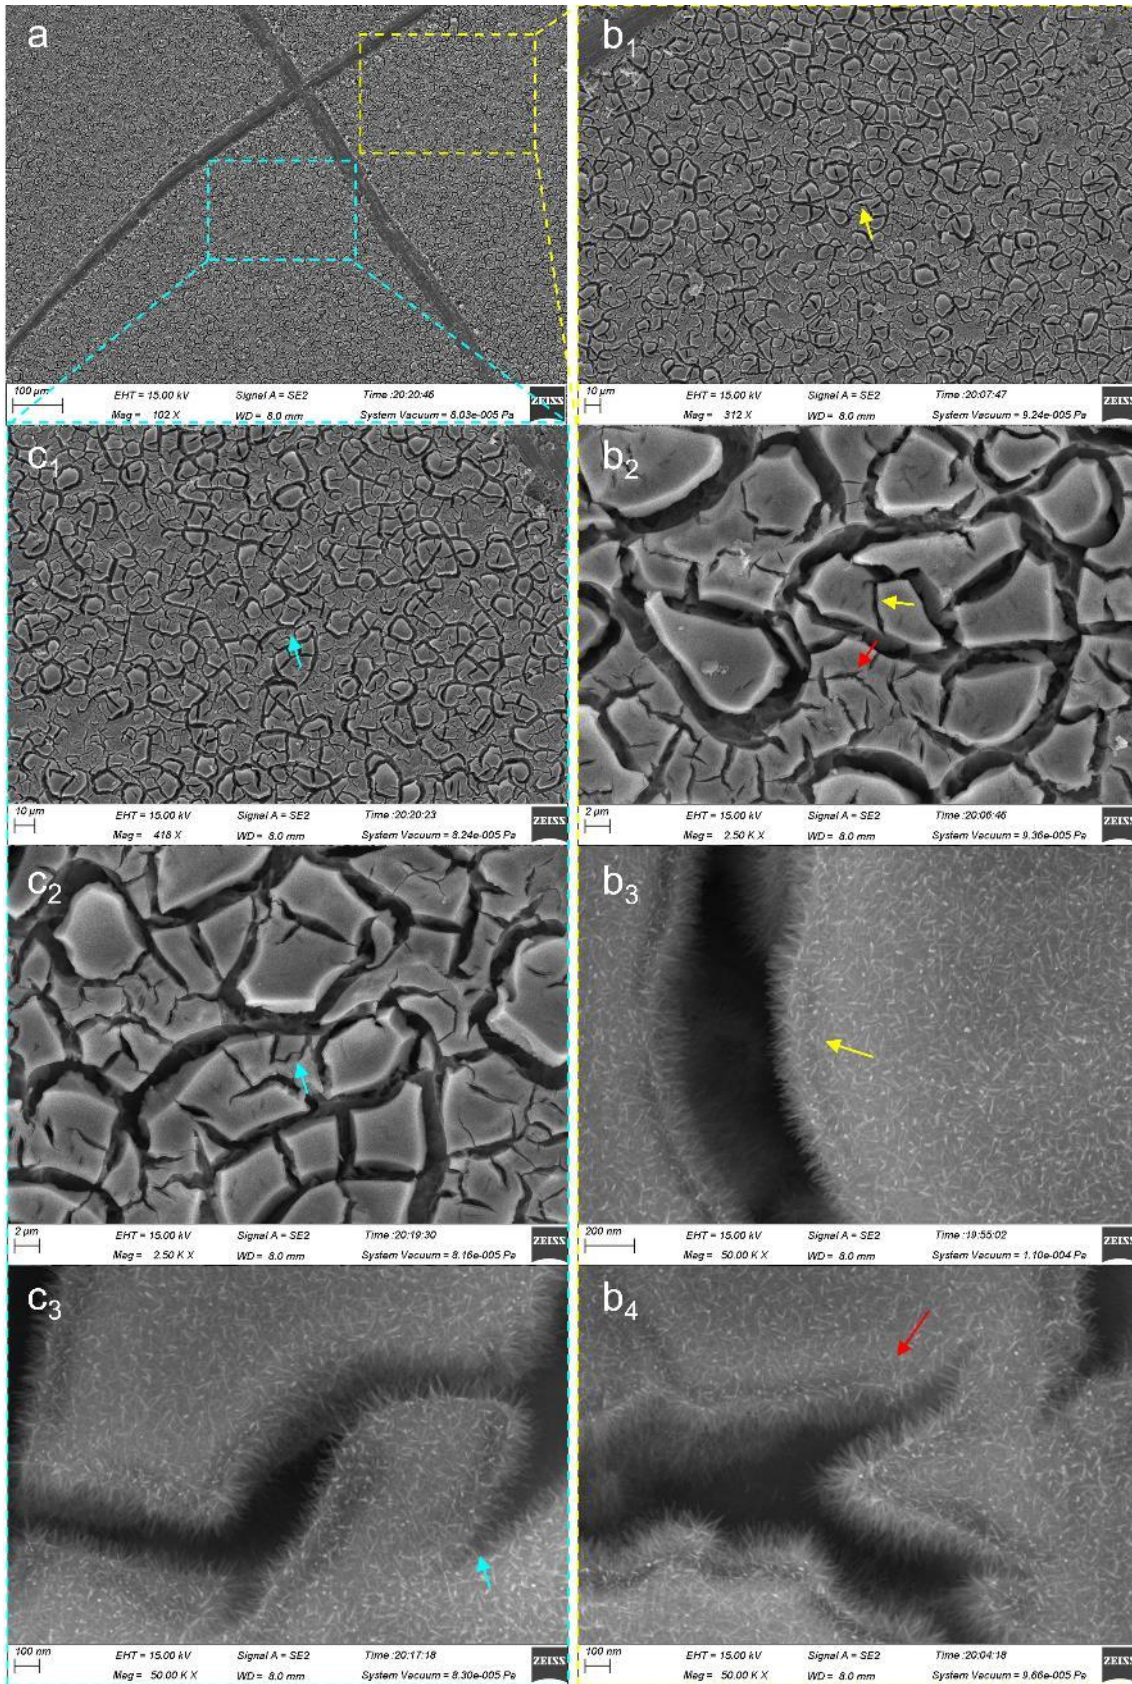

Supplementary Fig. 4 | SEM images of py-RuO<sub>2</sub>:Zn.

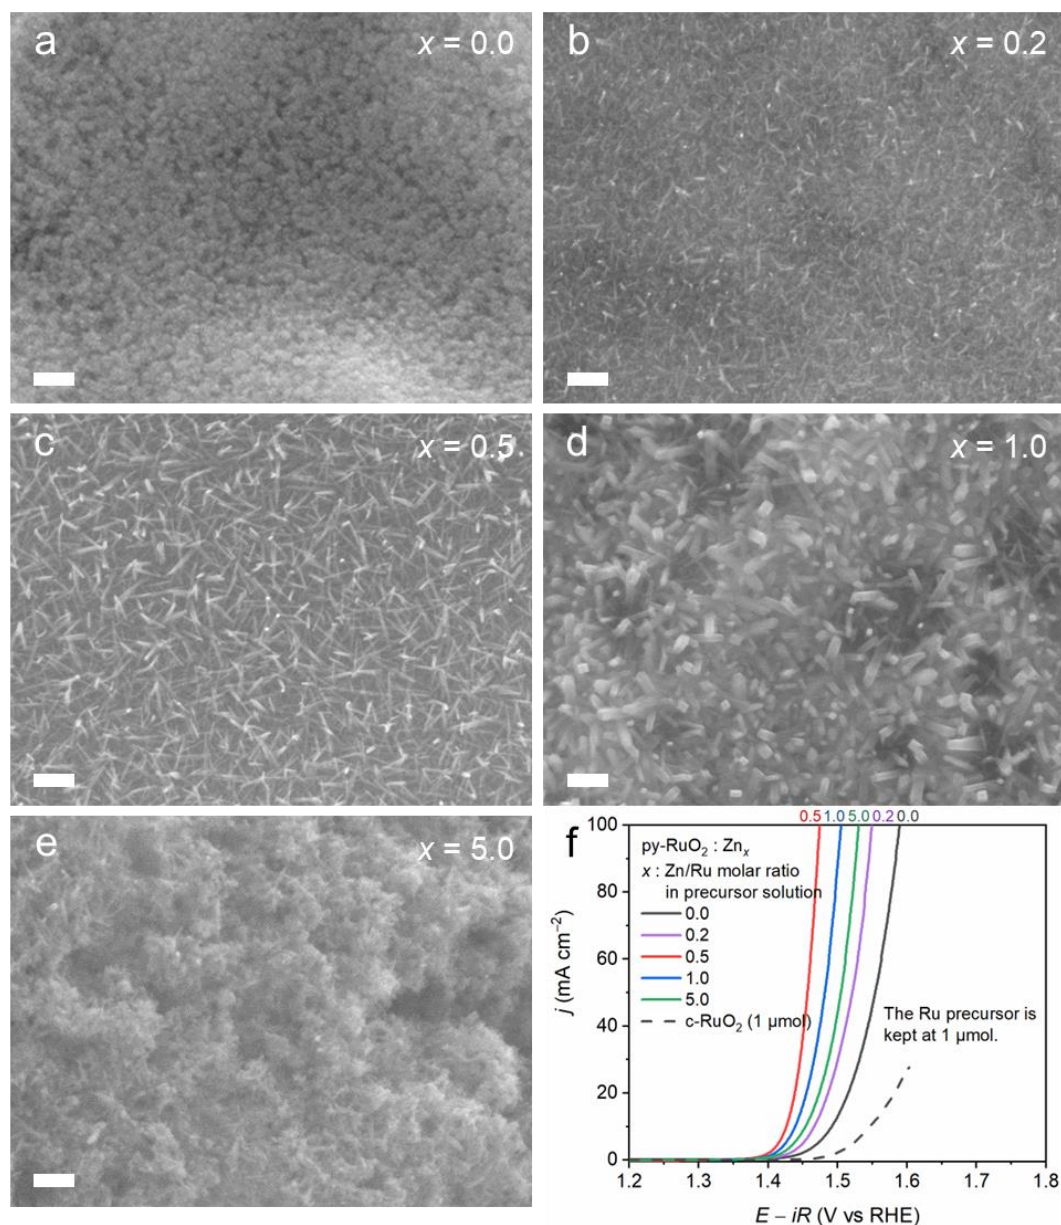

**Supplementary Fig. 5 | SEM images and OER activity of py-RuO<sub>2</sub>:Zn catalysts.** (a–e) SEM images of py-RuO<sub>2</sub>:Zn catalysts prepared using different amounts of Zn in the precursor solution. Scale bar: 100 nm. (f) LSV curves of different catalysts for OER in O<sub>2</sub>-saturated H<sub>2</sub>SO<sub>4</sub>. The amount of Ru precursor was fixed at 1 μmol (electrode area: 0.5 cm<sup>2</sup>).

The “x” in Supplementary Fig. 5f is referred to the Zn/Ru molar ratio in the precursor solution, equally to the dosage ratio of Zn(NO<sub>3</sub>)<sub>2</sub> to RuCl<sub>3</sub> used in the catalyst preparation. The value is obviously higher than the final content of Zn dopants in py-RuO<sub>2</sub>:Zn, due to the fact that most of the Zn elements from Zn(NO<sub>3</sub>)<sub>2</sub> precursor were converted to the ZnO product under the pyrolytic treatment, rather than being doped into RuO<sub>2</sub> lattice. The unwanted ZnO composition was removed using an acid etching procedure before the subsequent experiments.

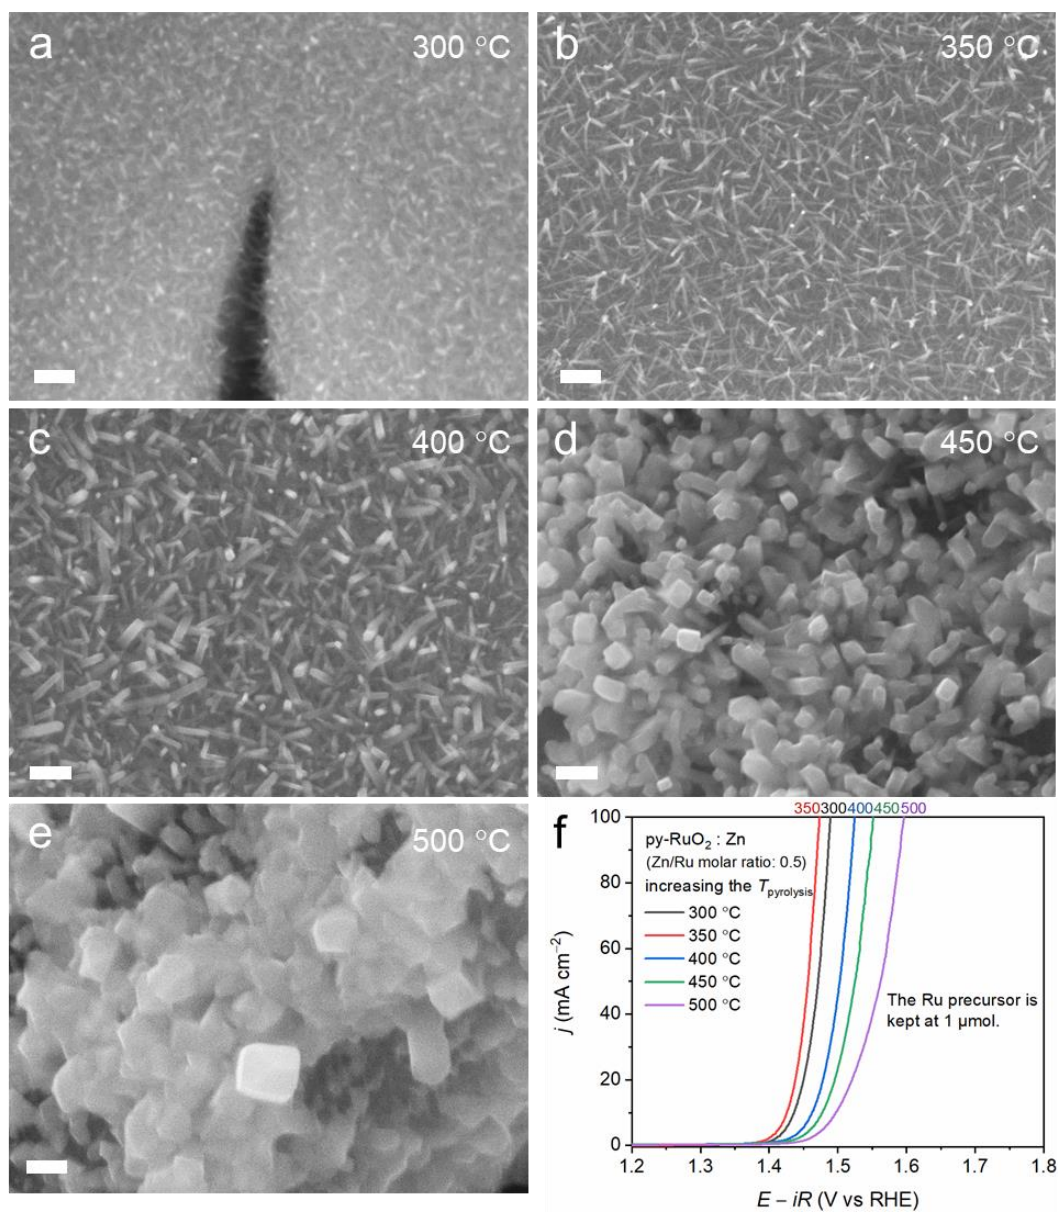

**Supplementary Fig. 6 | SEM images and OER activity of py-RuO<sub>2</sub>:Zn catalysts.** (a–e) SEM images of py-RuO<sub>2</sub>:Zn catalysts prepared at different pyrolysis temperatures. Scale bar: 100 nm. (f) LSV curves of different catalysts for OER in O<sub>2</sub>-saturated 0.5 M H<sub>2</sub>SO<sub>4</sub>. The amount of Ru precursor was fixed at 1 μmol (electrode area: 0.5 cm<sup>2</sup>) with a Zn/Ru molar ratio of 0.5.

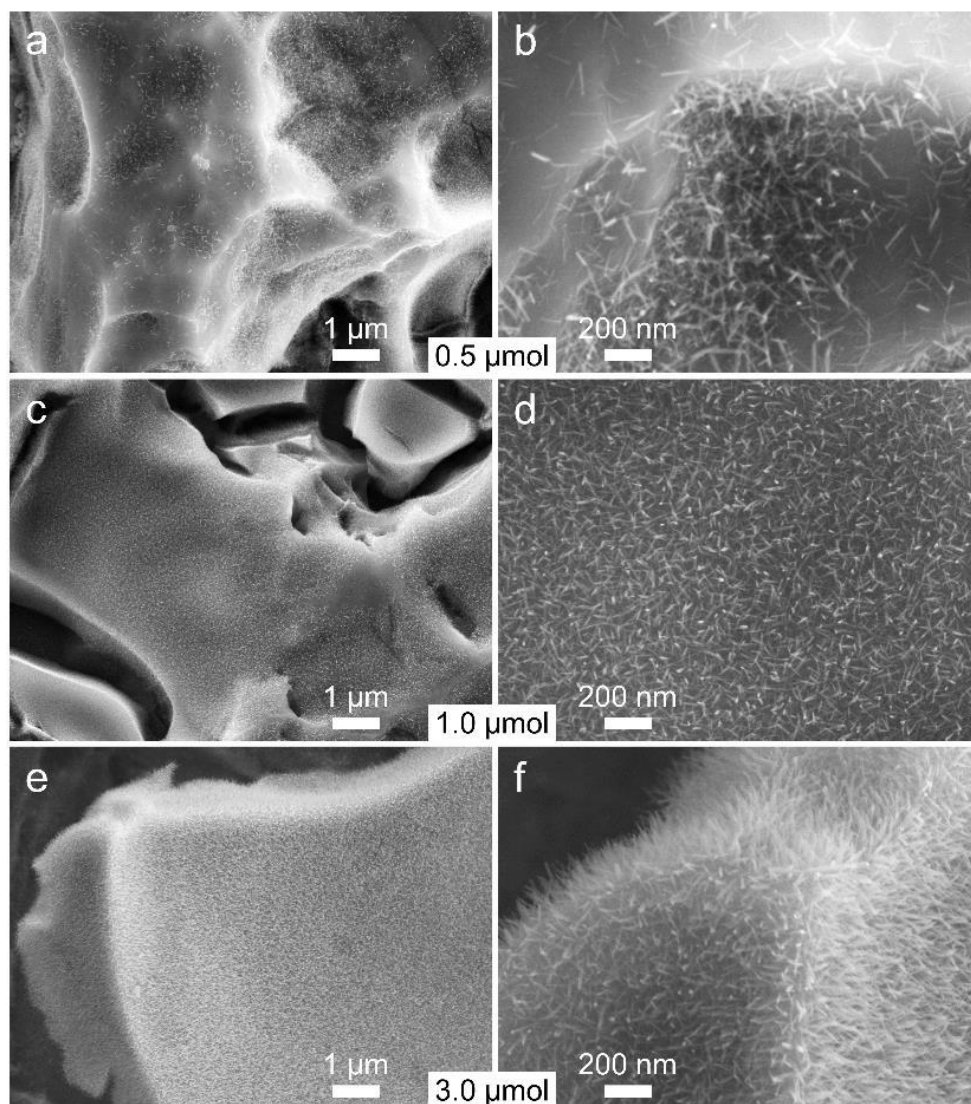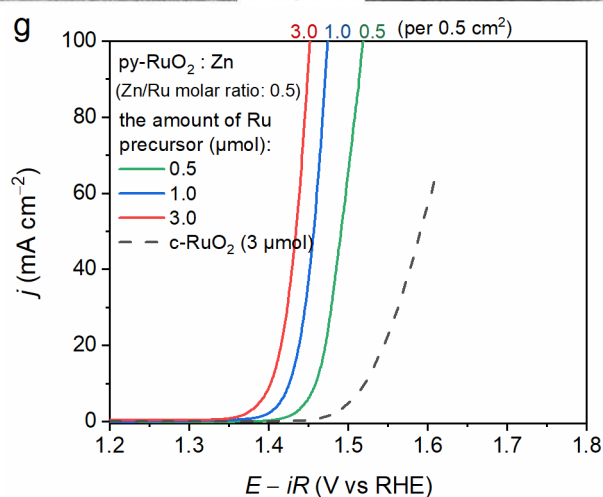

**Supplementary Fig. 7 | SEM images and OER activity of py-RuO<sub>2</sub>:Zn catalysts.** (a–f) SEM images of py-RuO<sub>2</sub>:Zn catalysts prepared using different amounts of Ru at a fixed Zn/Ru molar ratio of 0.5 in precursor solution (electrode area: 0.5 cm<sup>2</sup>). (g) LSV curves of different catalysts for OER in O<sub>2</sub>-saturated 0.5 M H<sub>2</sub>SO<sub>4</sub>.



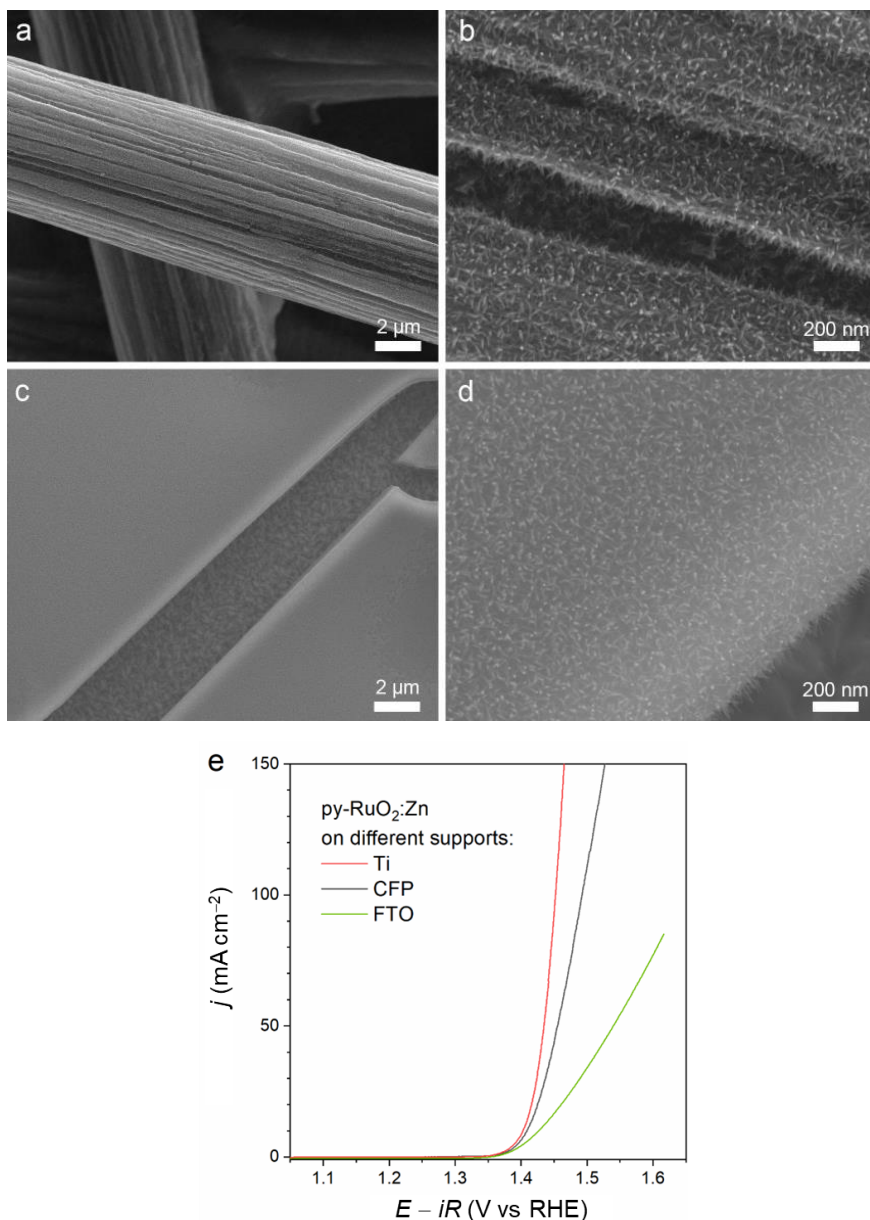

**Supplementary Fig. 8 | SEM images and OER activity of py-RuO<sub>2</sub>:Zn catalysts prepared on different substrates.** SEM images of py-RuO<sub>2</sub>:Zn nanowire arrays prepared on carbon fiber paper (CFP) (a, b) and fluorine-doped tin oxide (FTO) glass (c, d) under the same pyrolysis conditions. (e) LSV curves of py-RuO<sub>2</sub>:Zn on Ti, CFP, and FTO glass supports for OER in 0.5 M H<sub>2</sub>SO<sub>4</sub> solution with O<sub>2</sub> saturation.

Due to the harsh operation conditions of acidic OER, the CFP will undergo serious degradation. Although FTO glass is more stable under the corrosive reaction conditions, the relatively lower conductivity would hinder the electron transfer efficiency at the interface. Therefore, the Ti plate was selected as the support for py-RuO<sub>2</sub>:Zn catalyst in this work, which is a widely used dimensionally stable anodes material in chlorine evolution process.

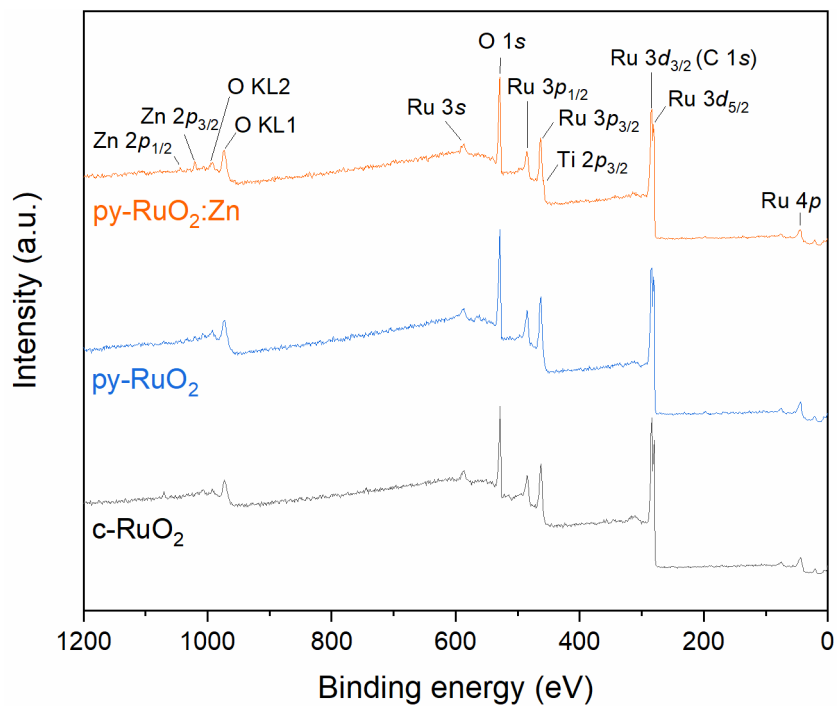

**Supplementary Fig. 9 | XPS survey spectra for py-RuO<sub>2</sub>:Zn, py-RuO<sub>2</sub> and c-RuO<sub>2</sub> catalysts.**

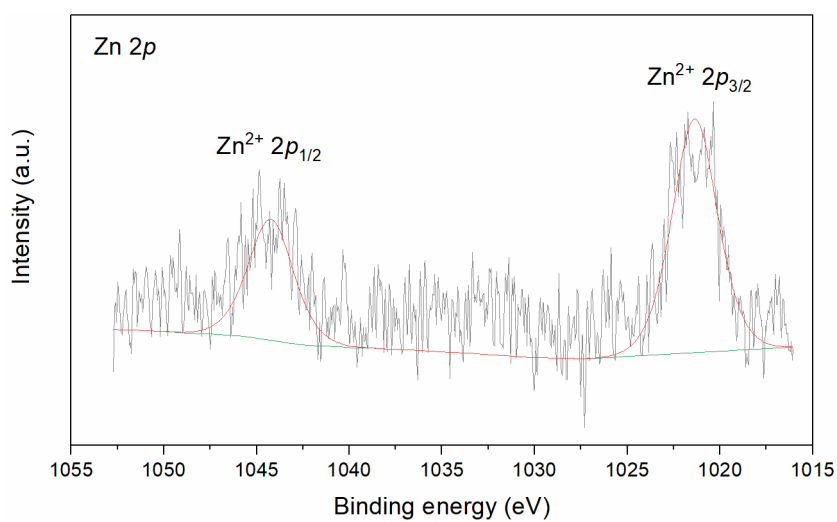

**Supplementary Fig. 10 | Core-level Zn 2p XPS spectrum for the py-RuO<sub>2</sub>:Zn catalyst.**

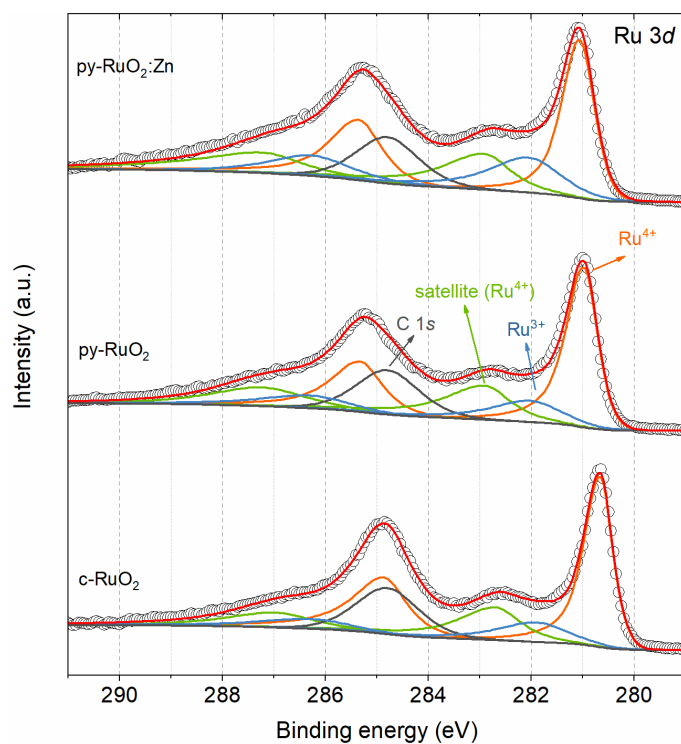

**Supplementary Fig. 11 | Core-level Ru 3d XPS spectra for the py-RuO<sub>2</sub>:Zn, py-RuO<sub>2</sub>, and c-RuO<sub>2</sub> catalysts.**

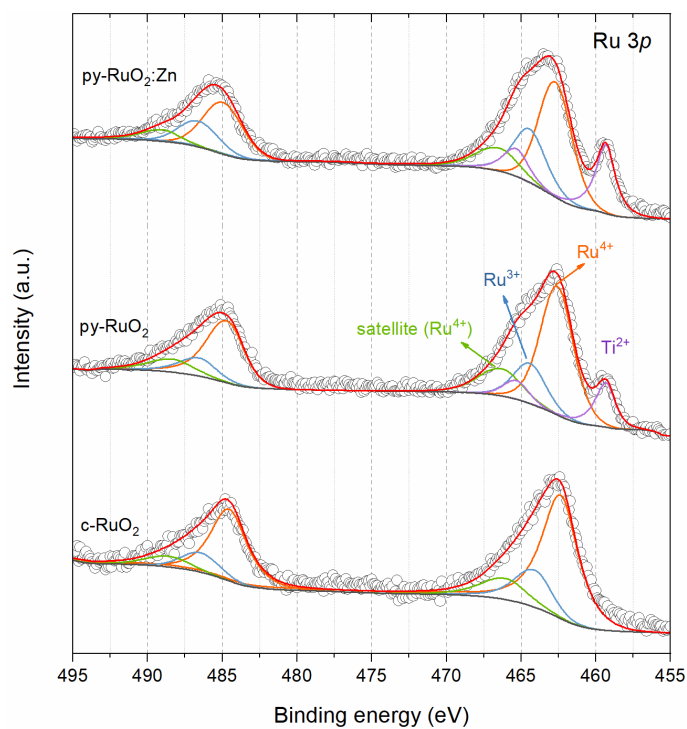

**Supplementary Fig. 12 | Core-level Ru 3p XPS spectra for the py-RuO<sub>2</sub>:Zn, py-RuO<sub>2</sub>, and c-RuO<sub>2</sub> catalysts.**

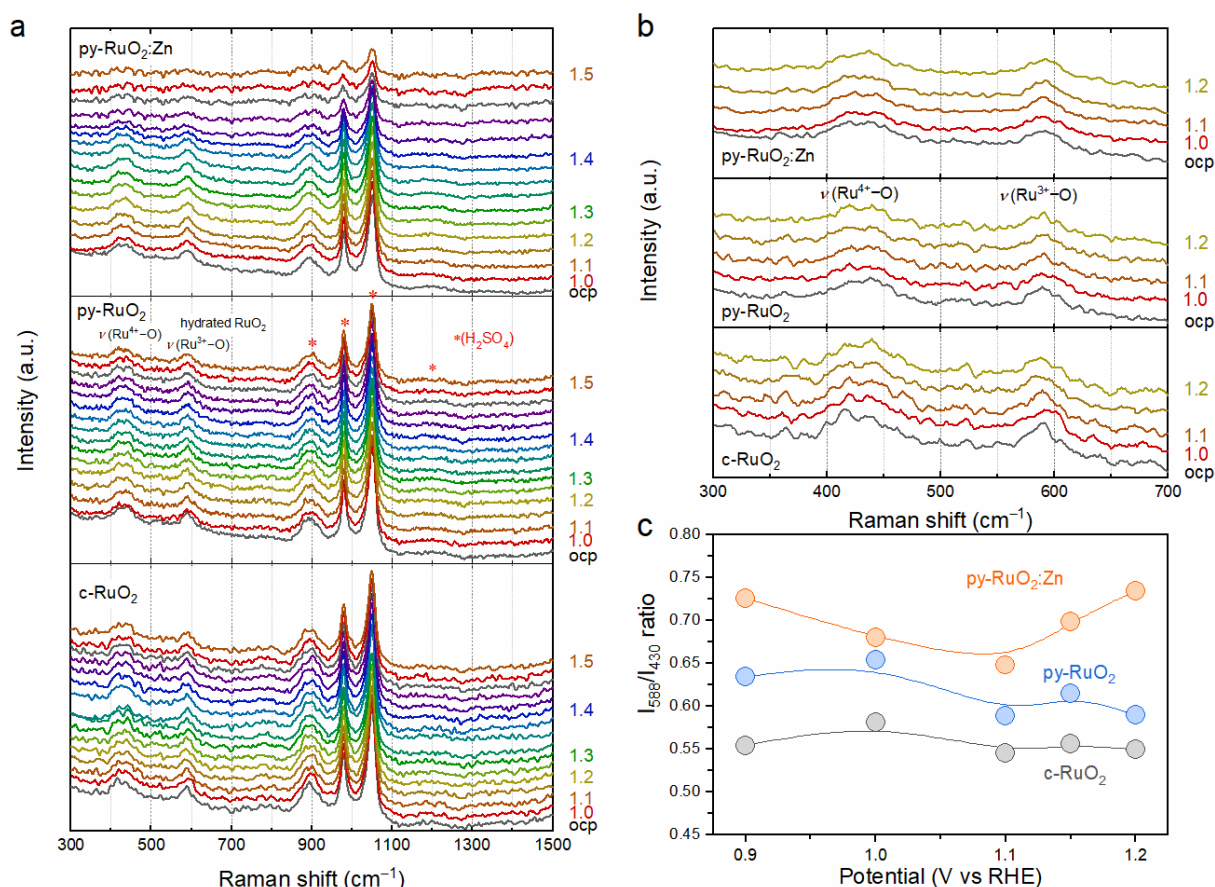

**Supplementary Fig. 13 | In-situ Raman spectra of OER on the catalysts.** (a, b) Raman spectra for py-RuO<sub>2</sub>:Zn, py-RuO<sub>2</sub>, and c-RuO<sub>2</sub> catalysts in O<sub>2</sub>-saturated 0.5 M H<sub>2</sub>SO<sub>4</sub> at given electrode potentials. (b) Normalized intensity of Raman band at 588 cm<sup>-1</sup> to that at 430 cm<sup>-1</sup> on the catalysts as a function of applied potential. The areas under the bands were used to calculate the I<sub>588</sub>/I<sub>430</sub> ratio.

Raman spectra were obtained at a Renishaw Raman Imaging Microscope System (inVia-Reflex) equipped with a CCD detector. Excitation radiation at 532 nm was used. The in-situ Raman spectroelectrochemical experiments were performed under constant cathodic potentials progressively stepping to positive limits from the open-circuit potential (OCP). Strong Raman bands at 430 and 588 cm<sup>-1</sup> were observed on both py-RuO<sub>2</sub>:Zn and c-RuO<sub>2</sub> catalysts, associated with the vibration of Ru<sup>4+</sup>-O bonds and Ru<sup>3+</sup>-O bonds of hydrated RuO<sub>2</sub> on the surface.<sup>1</sup> When further normalizing the intensity of the band at 588 cm<sup>-1</sup> to that at 430 cm<sup>-1</sup>, represented by the area ratio under the bands, we found that the py-RuO<sub>2</sub>:Zn catalyst showed a higher intensity than two others, thereby possessing more Ru<sup>3+</sup> species on the surface.

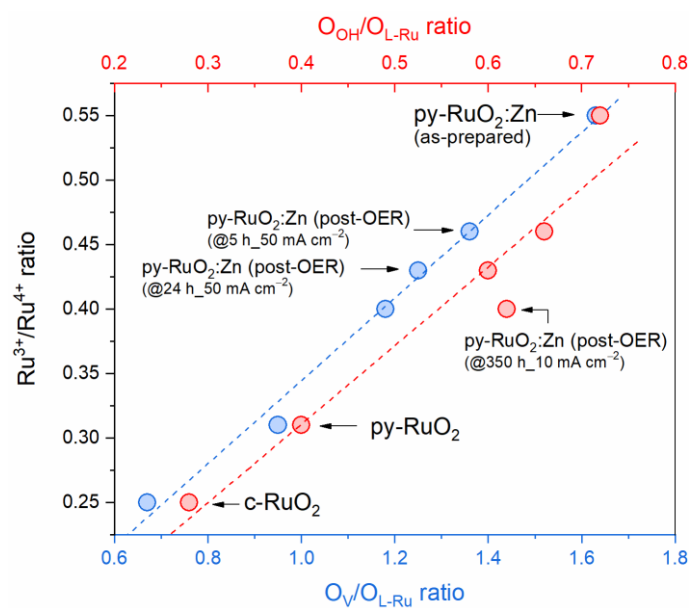

**Supplementary Fig. 14 | Relationship analysis of Ru<sup>3+</sup> abundance with the concentrations of V<sub>O</sub> defects and OH adsorbates from the XPS results of Ru 3p and O 1s.**

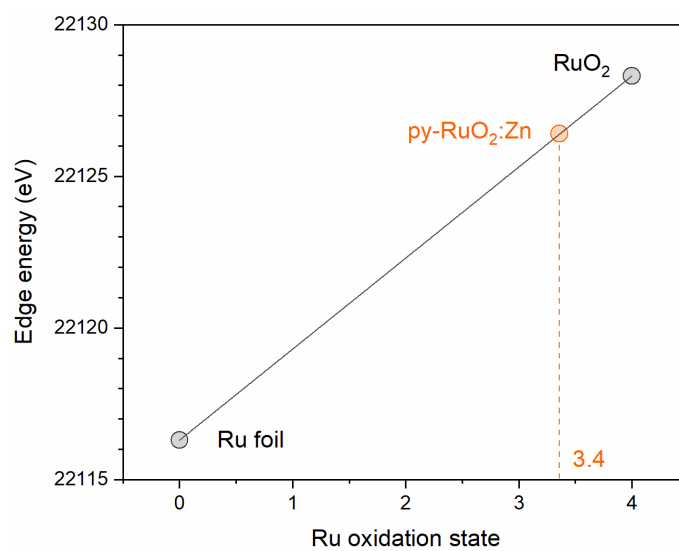

**Supplementary Fig. 15 | The edge energies for Ru K-edge as a function of the oxidation state of the Ru.**

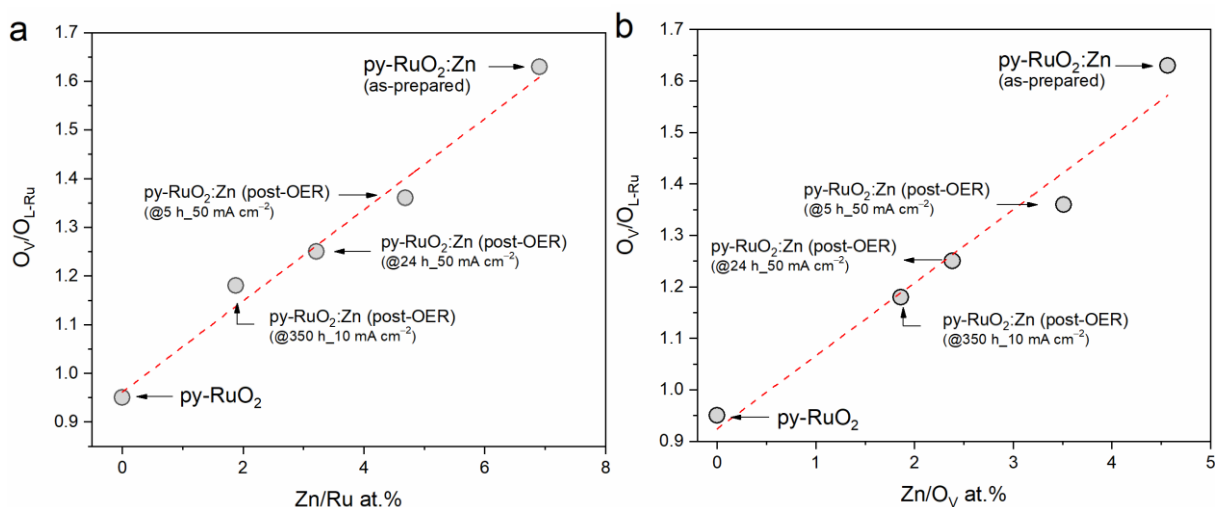

**Supplementary Fig. 16 | The dependence of  $V_O$  defect ( $O_V/O_{L-Ru}$  ratio) on the content of Zn dopants on the basis of XPS results.** The content of Zn dopants was respectively represented by (a) Zn/Ru at.% and (b) Zn/ $O_V$  at.% values.

There was a linear dependence of  $O_V/O_{L-Ru}$  on the Zn content, indicating that the doping of Zn element can induce the generation of  $V_O$  defects. However, a longitudinal interception of the fitted curve in Supplementary Fig. 16a was found to be 0.96. This means that the undoped  $RuO_2$  would also contain high concentration of  $V_O$  defects. The value, interestingly, well matched the measured 0.97 for  $O_V/O_{L-Ru}$  on the undoped  $py-RuO_2$  catalyst prepared here. The presence of  $V_O$  defect in pure  $RuO_2$  was caused by the relatively lower calcination temperature of catalyst synthesis procedure.<sup>2</sup> In the meantime, the doping of Zn induced a further linear increase of  $V_O$  defect, from 0.97 to 1.63 of  $O_V/O_{L-Ru}$  as the Zn/Ru at.% increased from 0 to 10.4% on the surface of the  $py-RuO_2:Zn$  catalysts. Accordingly, two factors, Zn doping and catalyst synthesis method, have resulted in the generation of  $V_O$  defect.

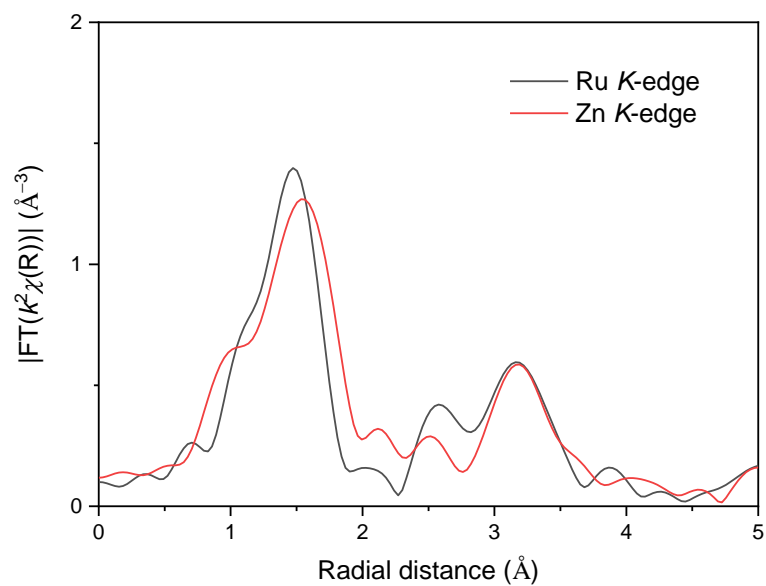

**Supplementary Fig. 17 | Ru *K*-edge and Zn *K*-edge FT-EXAFS R-space spectra for py-RuO<sub>2</sub>:Zn.**

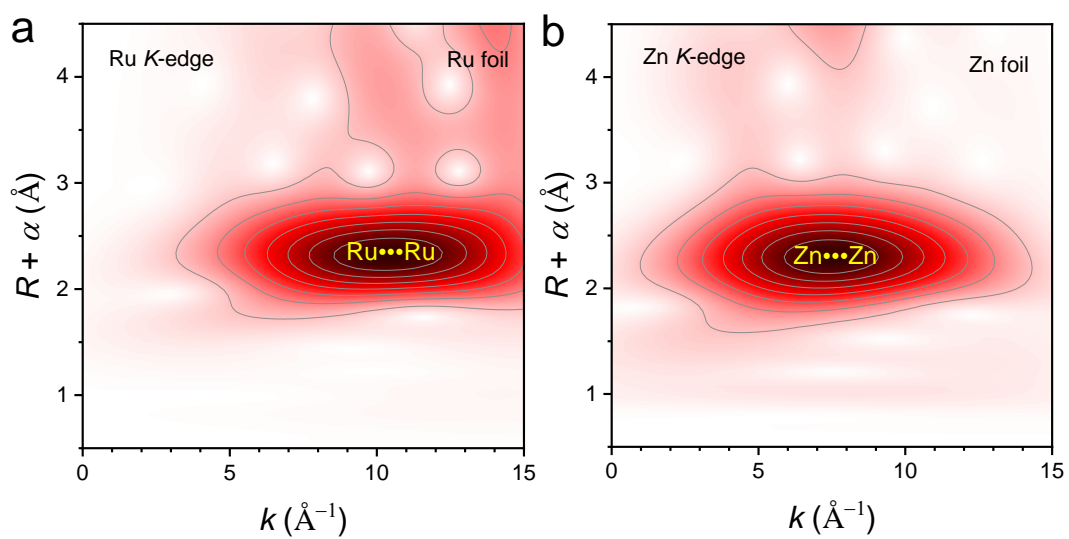

**Supplementary Fig. 18 | WT-EXAFS spectra for metallic Ru and Zn. (a) Ru *K*-edge and (b) Zn *K*-edge WT-EXAFS spectra for Ru foil and Zn foil, respectively.**

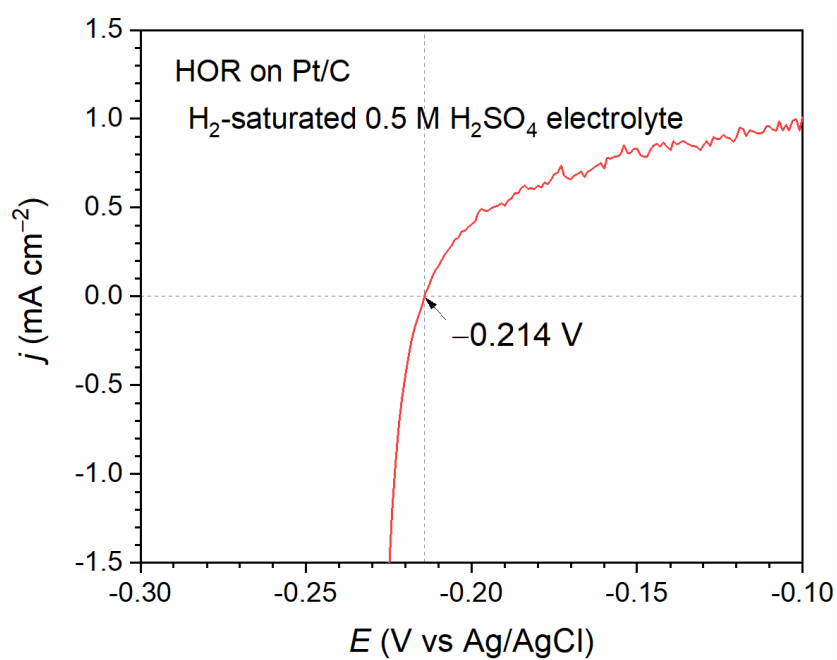

**Supplementary Fig. 19 | LSV curve for the calibration of Ag/AgCl electrode in 0.5 M H<sub>2</sub>SO<sub>4</sub> electrolyte with H<sub>2</sub> saturation.** Commercial Pt/C, Ag/AgCl, and Pt plate were used as working, reference, and counter electrodes, respectively. scan rate: 1 mV s<sup>-1</sup>.



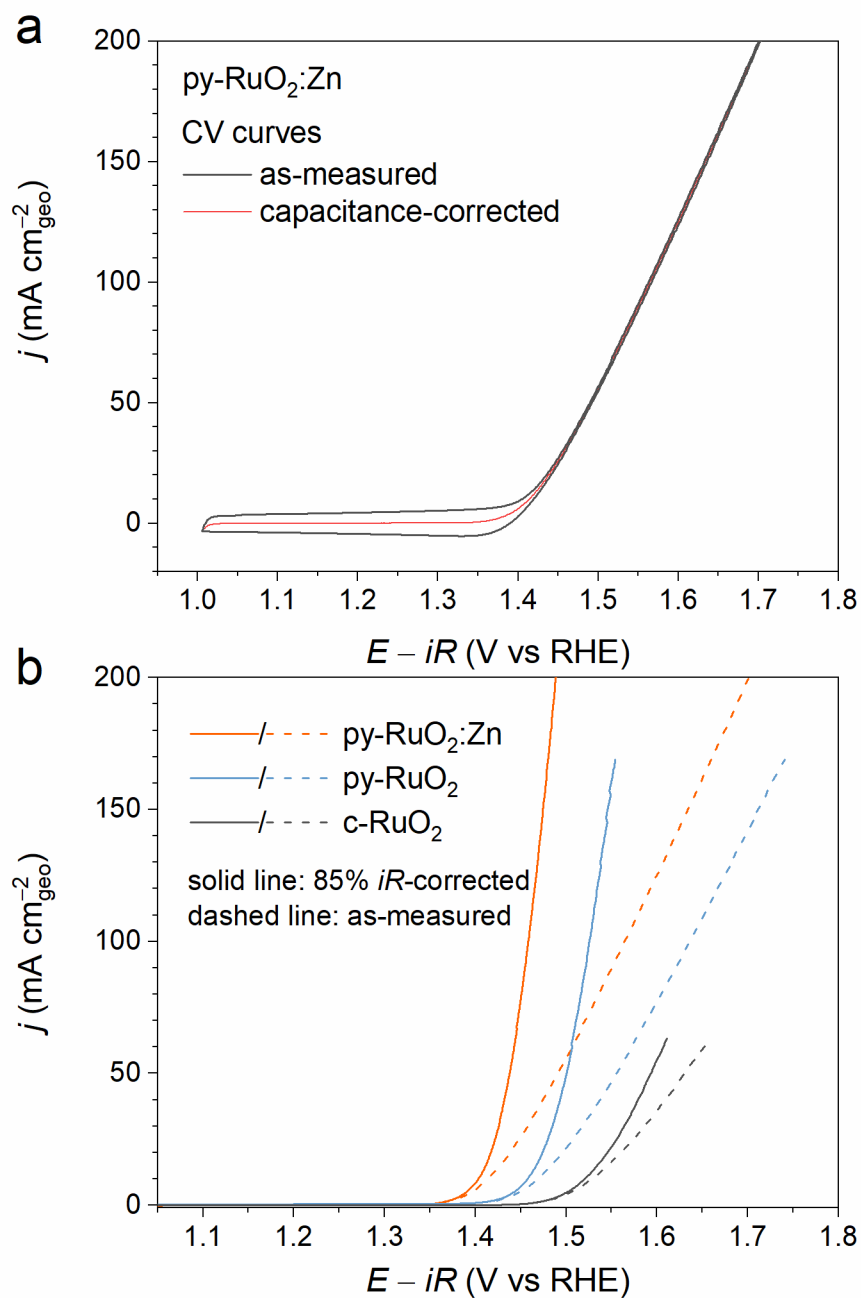

**Supplementary Fig. 20 | Capacitance-correction and  $iR$ -correction of CV curve for OER.** (a) Capacitance-correction of CV curve for OER on the py-RuO<sub>2</sub>:Zn catalyst in O<sub>2</sub>-saturated 0.5 M H<sub>2</sub>SO<sub>4</sub> solution. (b) As-measured and 85%  $iR$ -corrected LSV curves for OER on the py-RuO<sub>2</sub>:Zn, py-RuO<sub>2</sub>, and c-RuO<sub>2</sub> catalysts in O<sub>2</sub>-saturated 0.5 M H<sub>2</sub>SO<sub>4</sub> solution. Solution resistances for  $iR$ -correction are 2.8, 2.6, and 4.5  $\Omega$  for py-RuO<sub>2</sub>:Zn, py-RuO<sub>2</sub>, and c-RuO<sub>2</sub>, respectively.

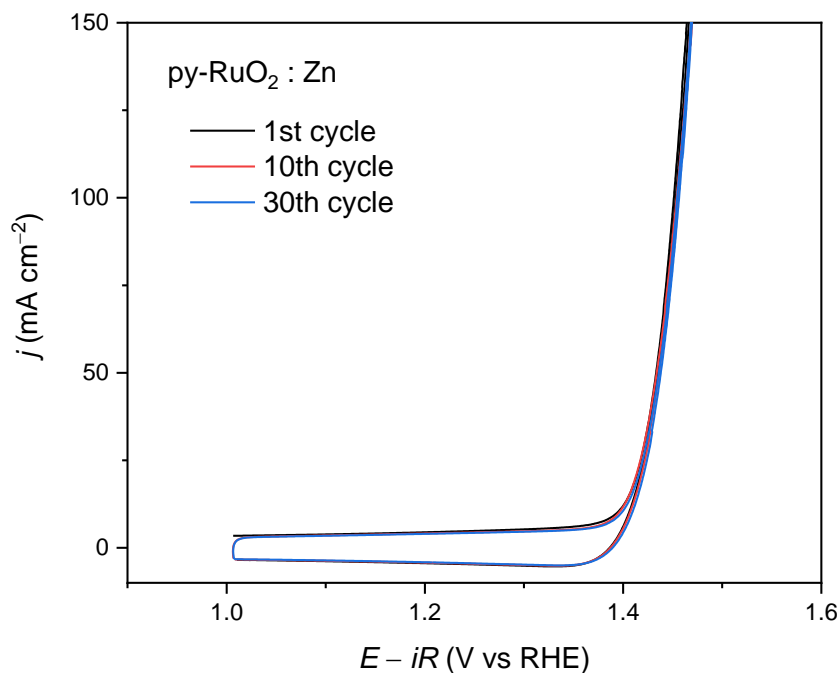

**Supplementary Fig. 21 | A comparison of CV curves for OER during initial 30 cycles on the py-RuO<sub>2</sub>:Zn catalyst in O<sub>2</sub>-saturated 0.5 M H<sub>2</sub>SO<sub>4</sub> solution.**

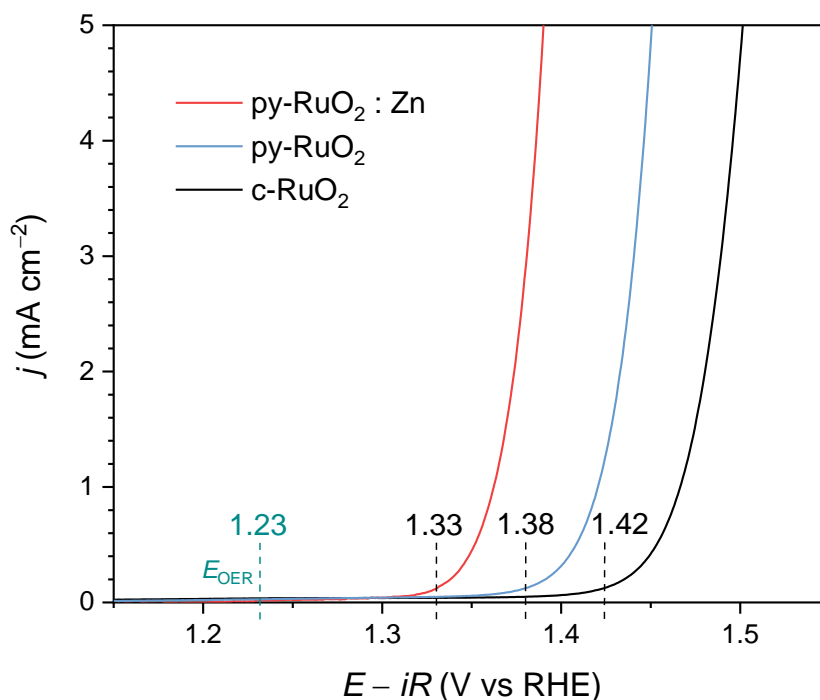

**Supplementary Fig. 22 | Onset potential analysis for OER.** LSV curves for OER on the py-RuO<sub>2</sub>:Zn, py-RuO<sub>2</sub>, and c-RuO<sub>2</sub> catalysts in O<sub>2</sub>-saturated 0.5 M H<sub>2</sub>SO<sub>4</sub> solution. The onset potentials for OER on different catalysts are indicated.

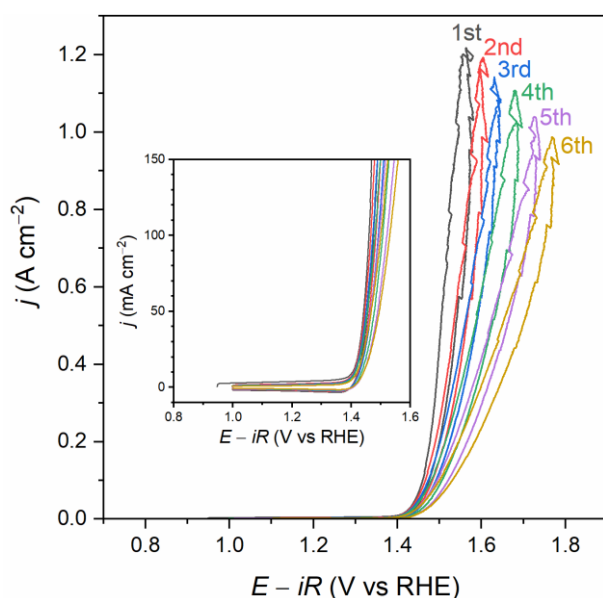

**Supplementary Fig. 23 | Continuous CV cycling curves of OER on py-RuO<sub>2</sub>:Zn.** Six continuous CV cycling curves of OER on the py-RuO<sub>2</sub>:Zn catalyst under the condition when the current density reached higher than 1 A cm<sup>-2</sup>. No capacitance correction was performed on the CV curves.

Clearly, the current density decayed significantly as the test progressed, most probably due to the degradation of the catalyst under the high current density. An obvious hysteresis between the anodic and cathodic curves was further observed. also probably caused by the degradation of the catalyst under the high current density.

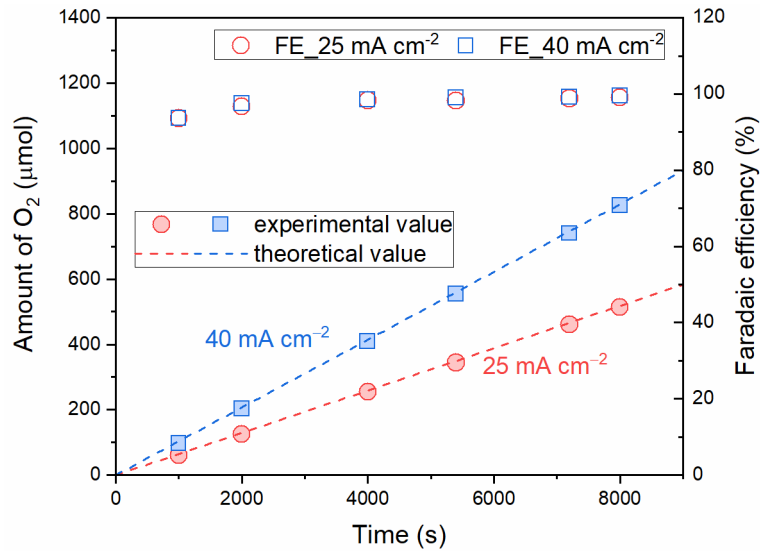

**Supplementary Fig. 24 | Faradaic efficiency analysis for OER on py-RuO<sub>2</sub>:Zn.** The FE of OER on py-RuO<sub>2</sub>:Zn catalyst as a function of reaction time determined by the water displacement method at current densities of 25 and 40 mA cm<sup>-2</sup>. The geometric area of electrode was 1.0 cm<sup>2</sup>.

Faradaic efficiency (FE) of OER was determined by water displacement method. The FE was calculated by the equation (1):

$$FE(\%) = \frac{n_{\text{exp}}(\text{O}_2)}{n_{\text{theor}}(\text{O}_2)} \times 100 \quad (1)$$

where  $n_{\text{exp}}(\text{O}_2)$  and  $n_{\text{theor}}(\text{O}_2)$  are experimental and theoretical amount of O<sub>2</sub> produced during the OER process.

According to the Faraday's law, the  $n_{\text{theor}}(\text{O}_2)$  was calculated by the equation (2):

$$n_{\text{thero}}(\text{O}_2) = \frac{I \cdot t}{z \cdot F} \quad (\text{mol}) \quad (2)$$

where  $I$  (A) is the current,  $t$  (s) is the OER reaction time,  $z = 4$  is the electron transfer number of OER,  $F = 96485 \text{ C mol}^{-1}$  is the Faraday constant.

The was determined by a water displacement method and calculated by the ideal gas law:

$$n_{\text{exp}}(\text{O}_2) = \frac{p \cdot V}{R \cdot T} \quad (\text{mol}) \quad (3)$$

where  $p = (101325 - 2813) \text{ Pa}$  is the partial pressure of O<sub>2</sub> produced,  $V$  (m<sup>3</sup>) is the volume of O<sub>2</sub> produced,  $R = 8.314 \text{ J mol}^{-1} \text{ K}^{-1}$  is the ideal gas constant,  $T = 293.15 \text{ K}$  is the reaction temperature.

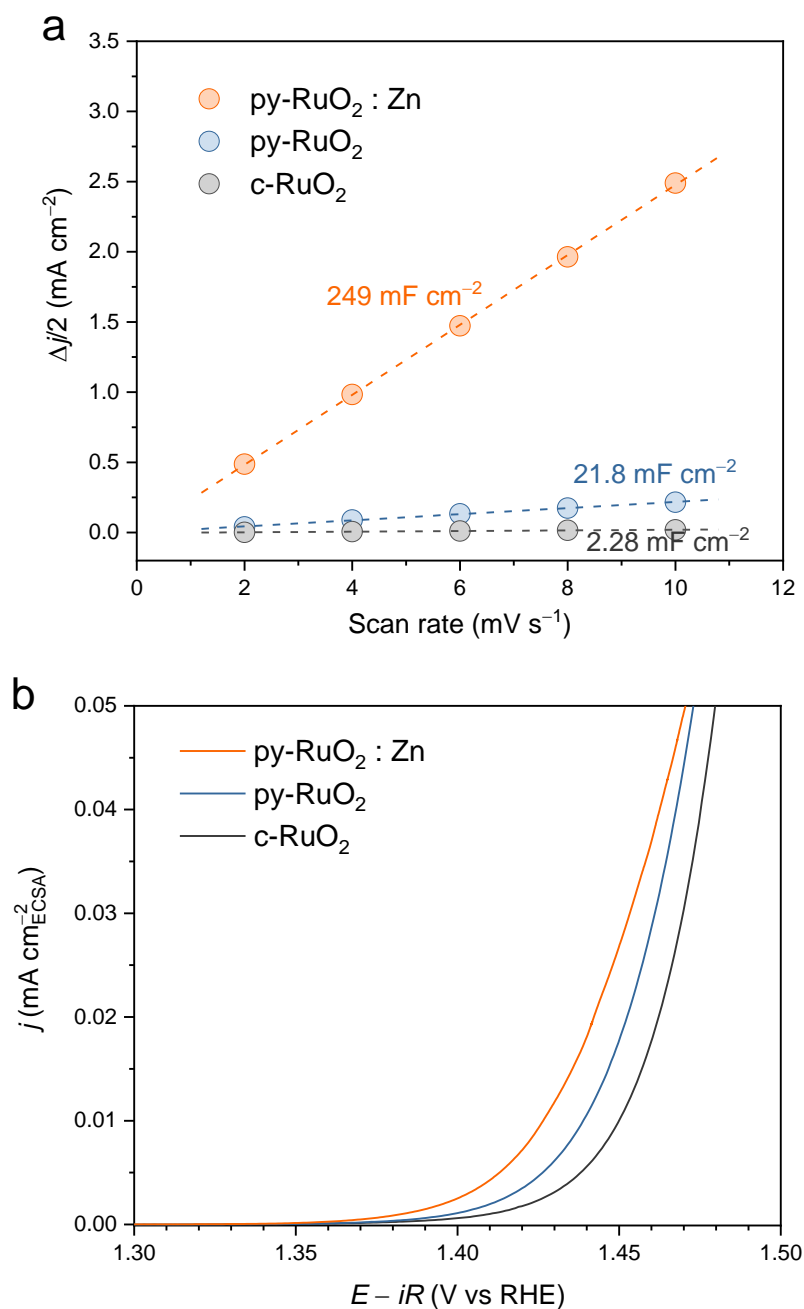

**Supplementary Fig. 25 |  $C_{dl}$  values and ECSA normalized LSV curves for OER on different catalysts.** (a)  $C_{dl}$  values for OER on the py-RuO<sub>2</sub>:Zn, py-RuO<sub>2</sub>, and c-RuO<sub>2</sub> catalysts in O<sub>2</sub>-saturated 0.5 M H<sub>2</sub>SO<sub>4</sub> solution. (b) ECSA normalized LSV curves for acidic OER on different catalysts. The ECSA values were calculated by dividing the  $C_{dl}$  by the capacitance of an ideal planar metal oxides with smooth surface ( $60 \mu\text{F cm}^{-2}$ ).

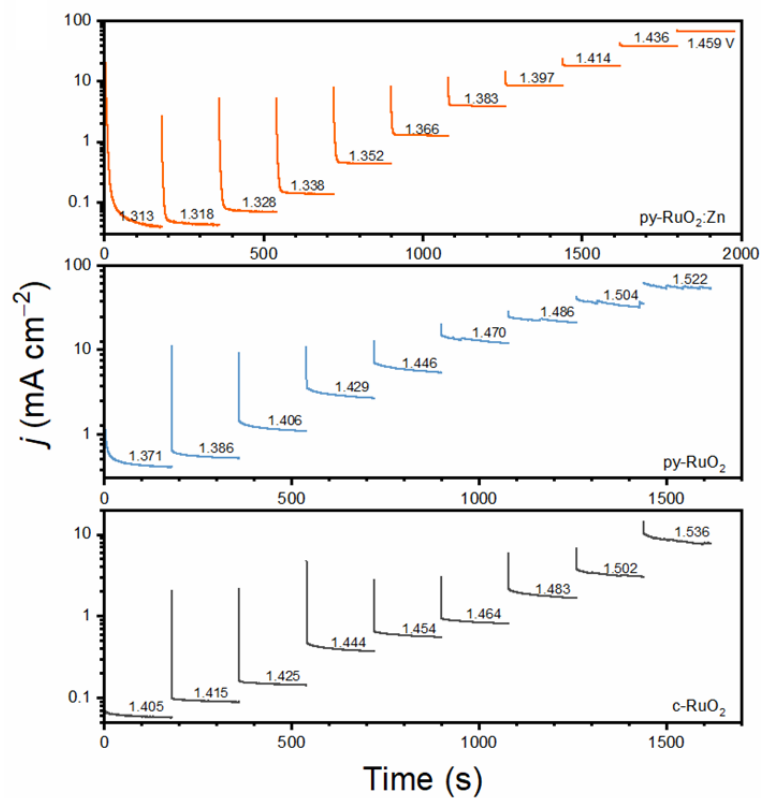

**Supplementary Fig. 26 | Chronoamperometric responses of the py-RuO<sub>2</sub>:Zn, py-RuO<sub>2</sub>, and c-RuO<sub>2</sub> catalysts for OER at different potentials.**

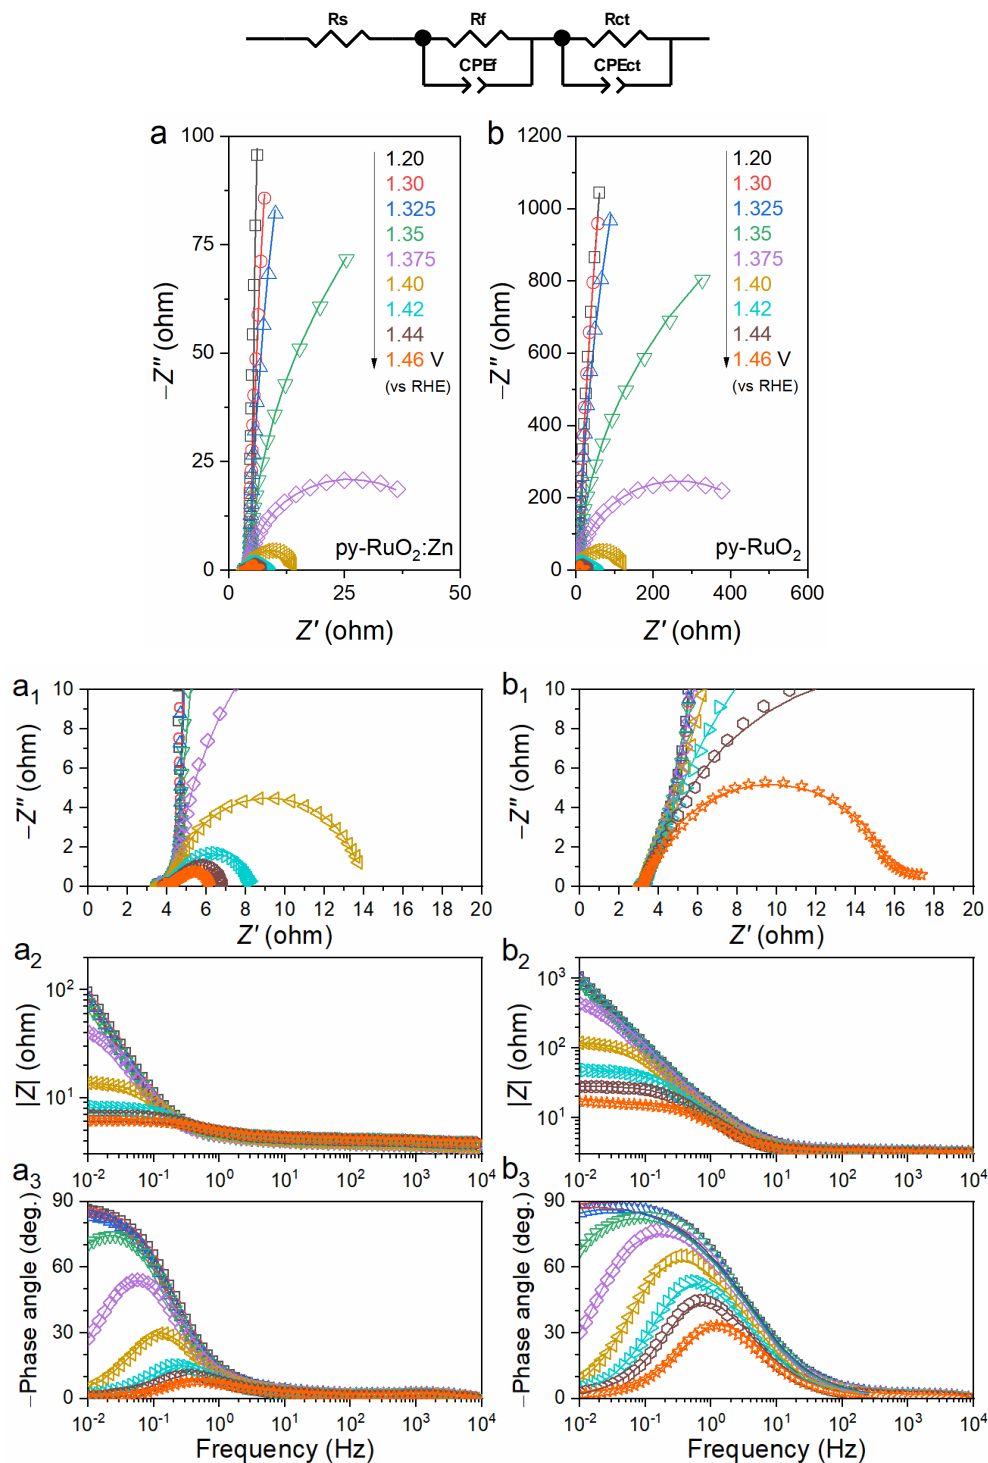

**Supplementary Fig. 27 | EIS analysis for OER on different catalysts.** EIS results for OER on the (a, a<sub>1</sub>–a<sub>3</sub>) py-RuO<sub>2</sub>:Zn and (a, a<sub>1</sub>–a<sub>3</sub>) py-RuO<sub>2</sub> catalysts in O<sub>2</sub>-saturated 0.5 M H<sub>2</sub>SO<sub>4</sub>. (a–a<sub>1</sub>, b–b<sub>1</sub>) Nyquist and (a<sub>2</sub>–a<sub>3</sub>, b<sub>2</sub>–b<sub>3</sub>) Bode plots at different potentials. EIS tests were performed at different applied potentials versus RHE (without *iR*-compensation) in the frequency range of 0.01 Hz to 100 KHz.

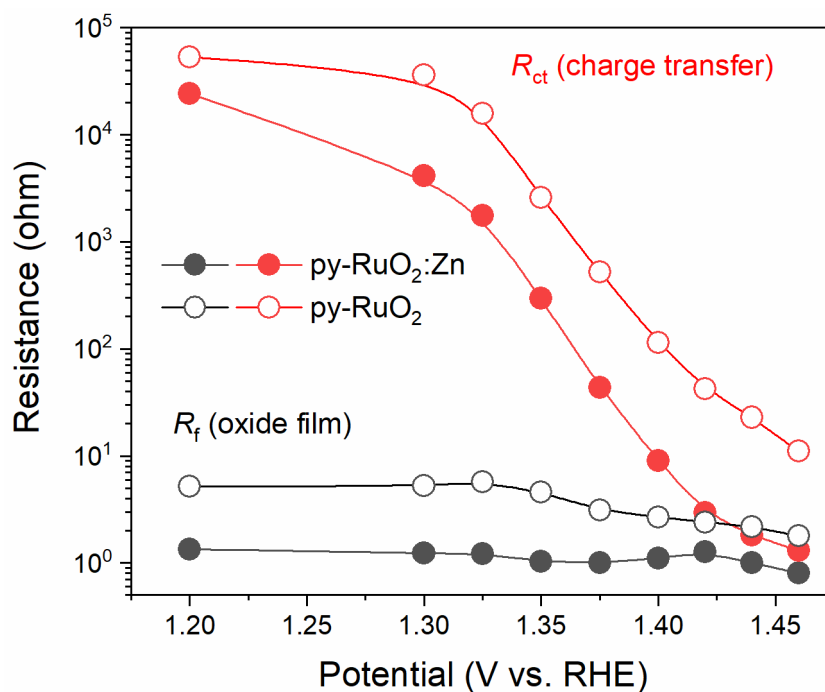

**Supplementary Fig. 28 | Resistance analysis for OER on different catalysts.** Charge transfer resistances ( $R_{ct}$ ) and oxide film resistances ( $R_f$ ) at different potentials for OER on the py-RuO<sub>2</sub>:Zn and py-RuO<sub>2</sub> catalysts were measured in O<sub>2</sub>-saturated 0.5 M H<sub>2</sub>SO<sub>4</sub> solution. The resistance values were calculated by fitting the EIS spectra shown in Supplementary Fig. 27.



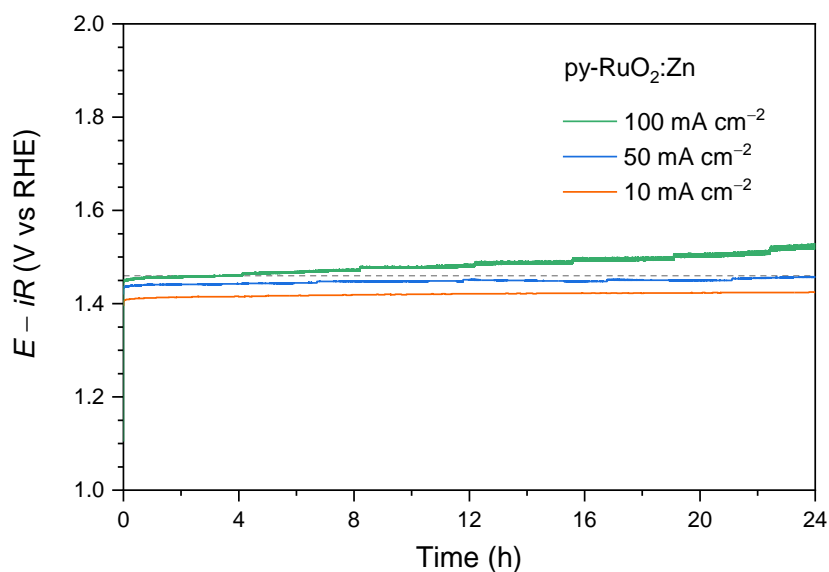

**Supplementary Fig. 29 | Chronopotentiometric stability tests of py-RuO<sub>2</sub>:Zn for OER at 10, 50, and 100 mA cm<sup>-2</sup> for 24 h in 0.5 M H<sub>2</sub>SO<sub>4</sub>. The dashed line was assigned to a potential of 1.46 V.**

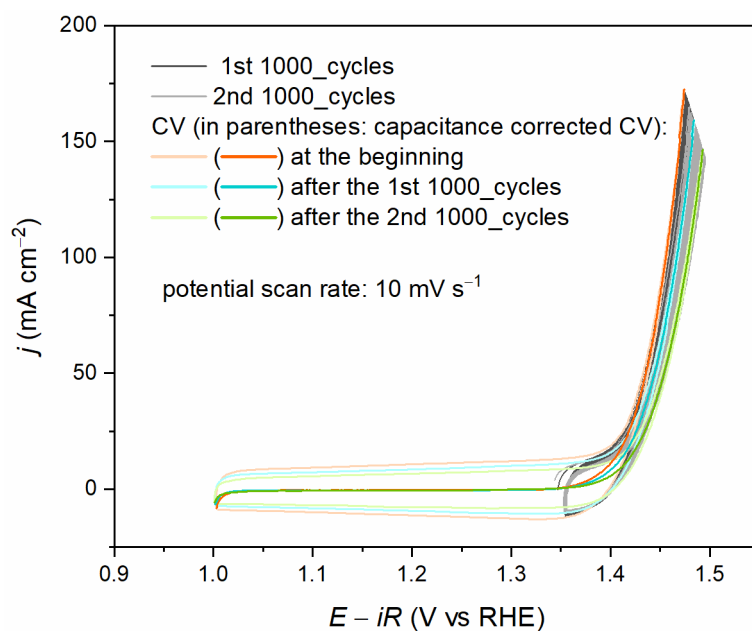

**Supplementary Fig. 30 | Durability test of the py-RuO<sub>2</sub>:Zn catalyst for acidic OER under the CV condition up to 2000 cycles. A doubled catalyst loading, about 520 mg per 0.5 cm<sup>2</sup>, was adopted for this measurement. Potential scan rate was 10 mV s<sup>-1</sup>.**

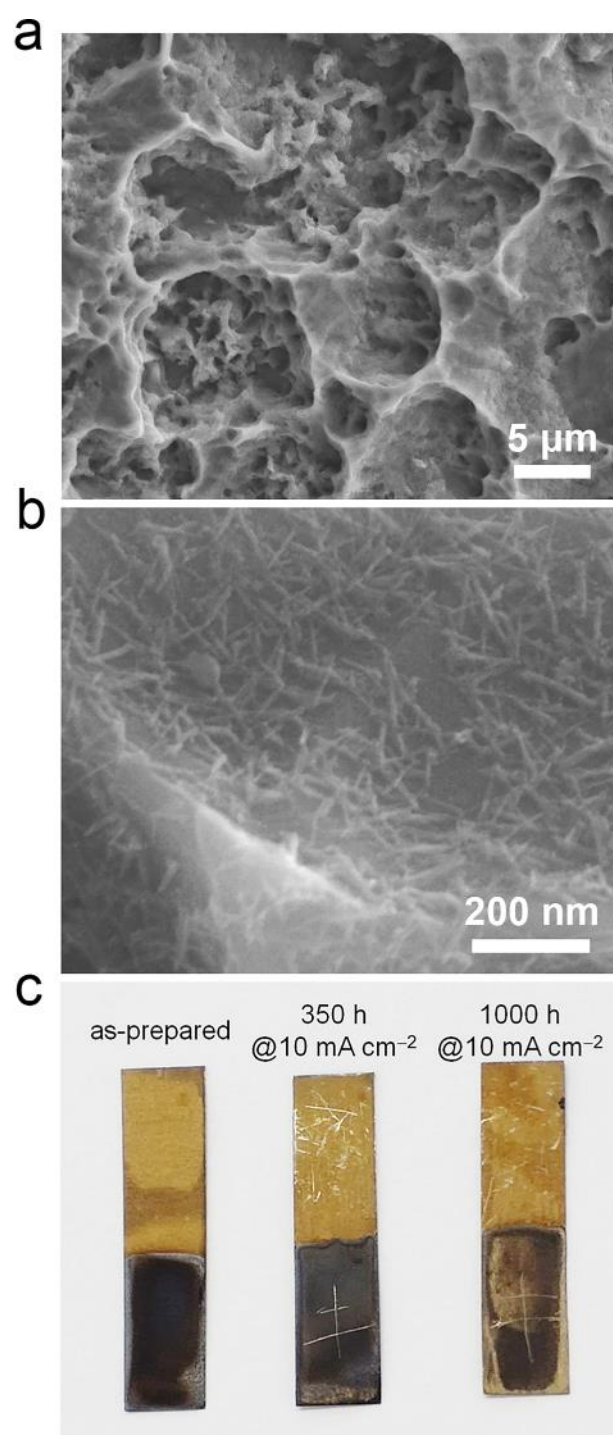

**Supplementary Fig. 31 | SEM images and optical photograph of catalysts.** (a, b) SEM images of the py-RuO<sub>2</sub>:Zn catalyst after an OER stability test at 10 mA cm<sup>-2</sup> for 1000 h. (c) Optical photograph of py-RuO<sub>2</sub>:Zn electrode before and after the stability tests.

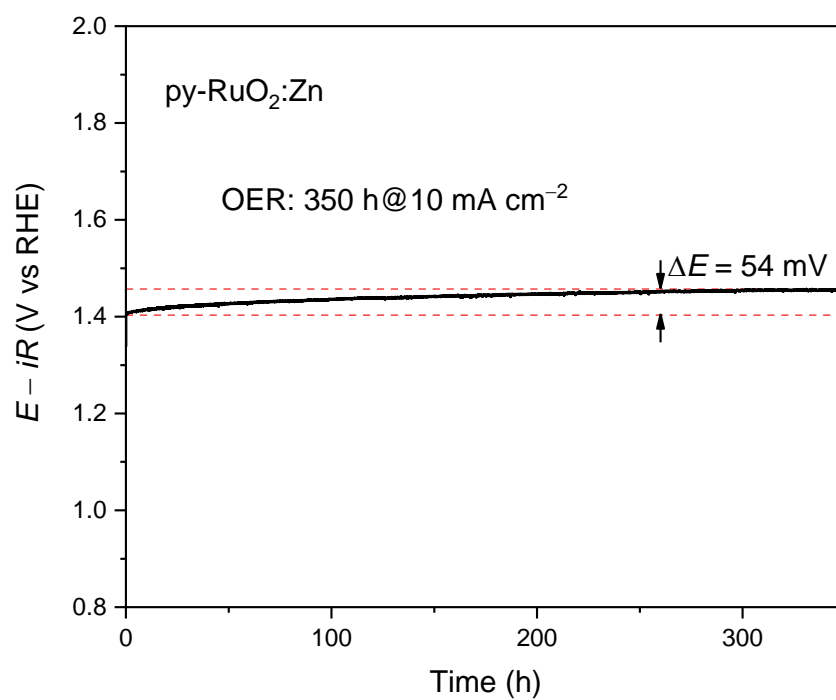

**Supplementary Fig. 32 | CP curve for OER stability test on the py-RuO<sub>2</sub>:Zn catalyst at 10 mA cm<sup>-2</sup> for 350 h in 0.5 M H<sub>2</sub>SO<sub>4</sub> solution.**

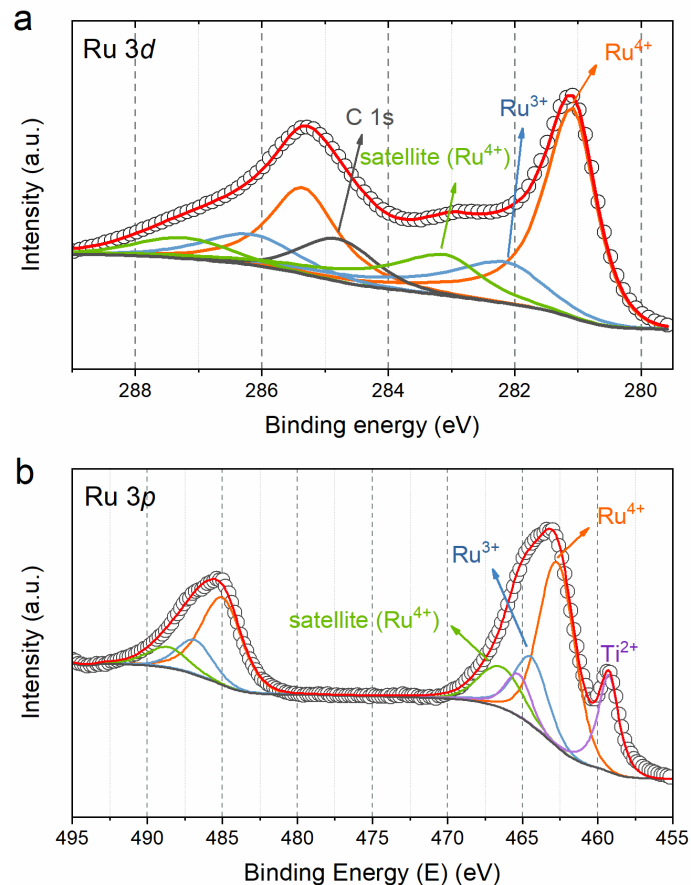

**Supplementary Fig. 33 | XPS spectra of py-RuO<sub>2</sub>:Zn catalyst.** Core-level (a) Ru 3d and (b) Ru 3p XPS spectra for the py-RuO<sub>2</sub>:Zn catalyst post the OER test at 10 mA cm<sup>-2</sup> for 350 h in 0.5 M H<sub>2</sub>SO<sub>4</sub> solution.

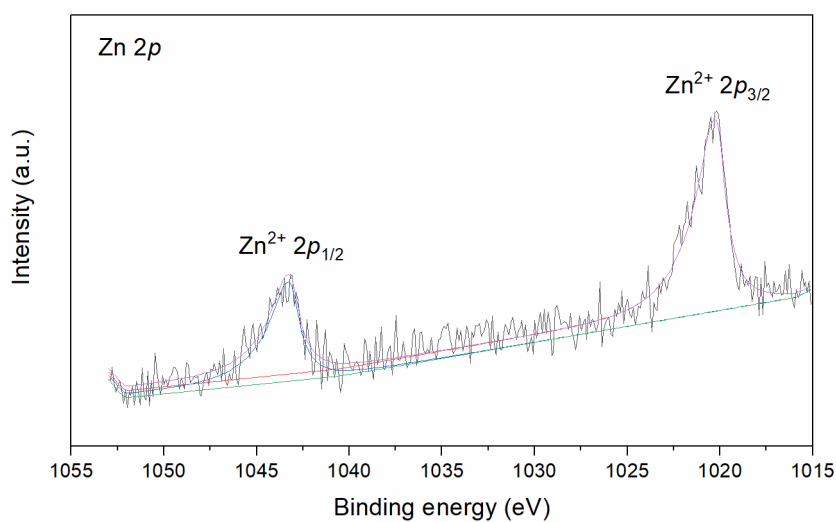

**Supplementary Fig. 34 | Core-level Zn 2p XPS spectra for the py-RuO<sub>2</sub>:Zn catalyst post the OER test at 10 mA cm<sup>-2</sup> for 350 h in 0.5 M H<sub>2</sub>SO<sub>4</sub> solution.**

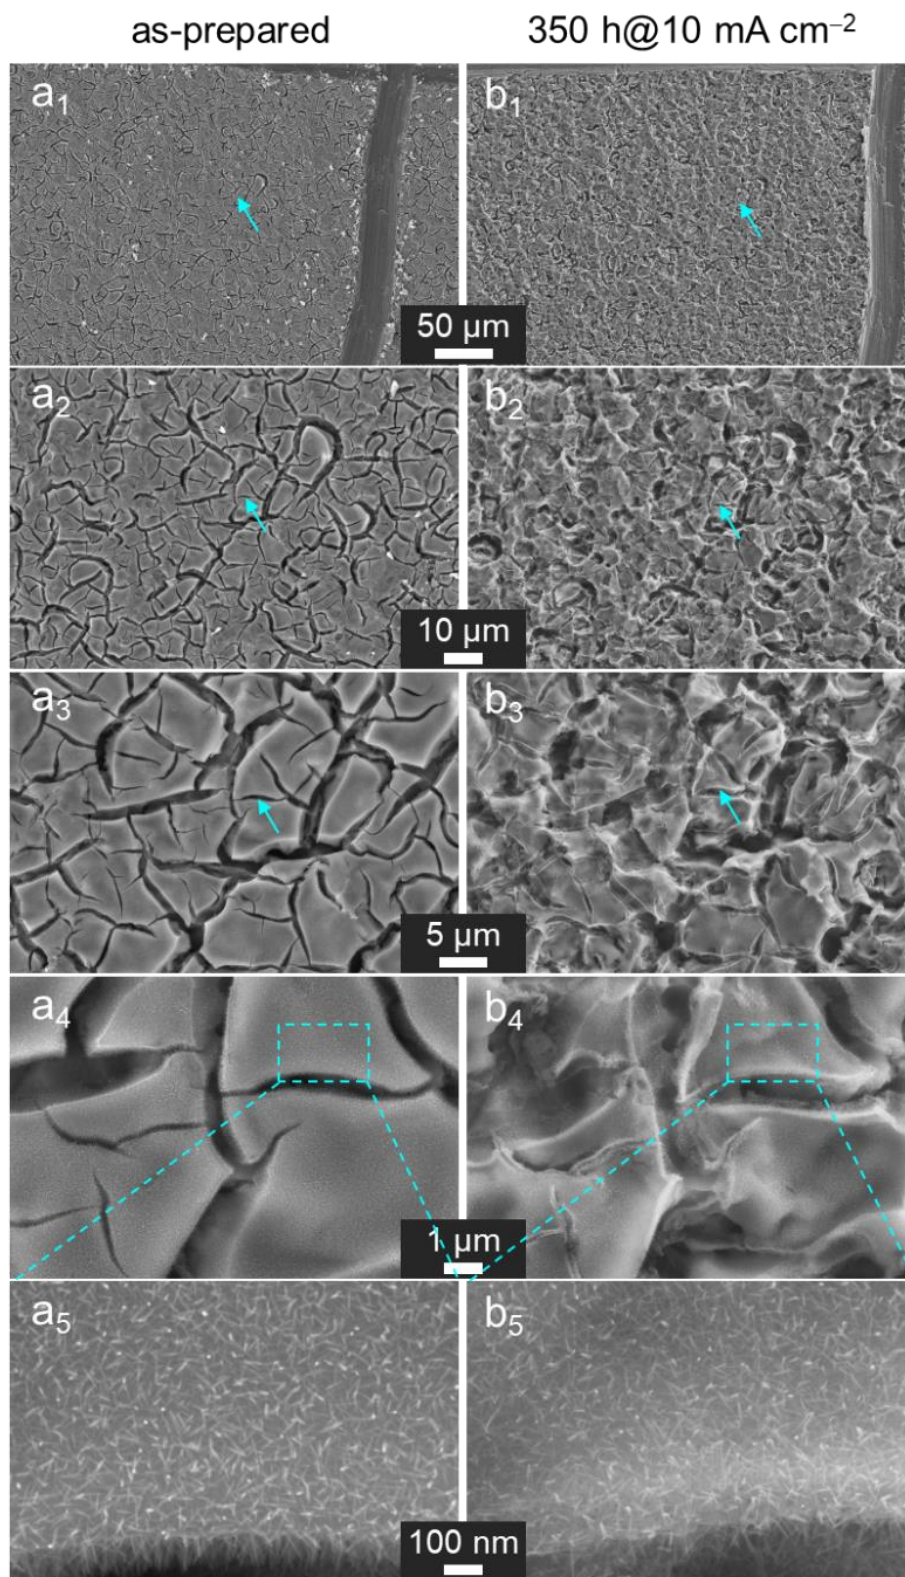

**Supplementary Fig. 35 | Quasi-in situ SEM images of py-RuO<sub>2</sub>:Zn catalyst. (a<sub>1</sub>–a<sub>5</sub>) before and (b<sub>1</sub>–b<sub>5</sub>) after an OER stability test at 10 mA cm<sup>-2</sup> for 350 h.**

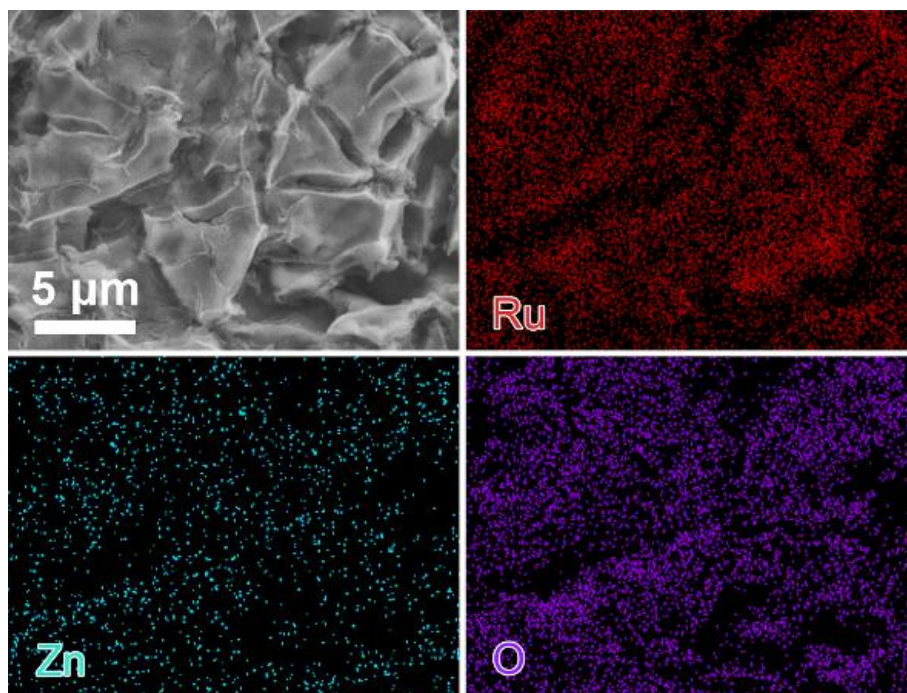

**Supplementary Fig. 36 | SEM image and EDS analysis of py-RuO<sub>2</sub>:Zn catalyst after an OER stability test at 10 mA cm<sup>-2</sup> for 350 h.**

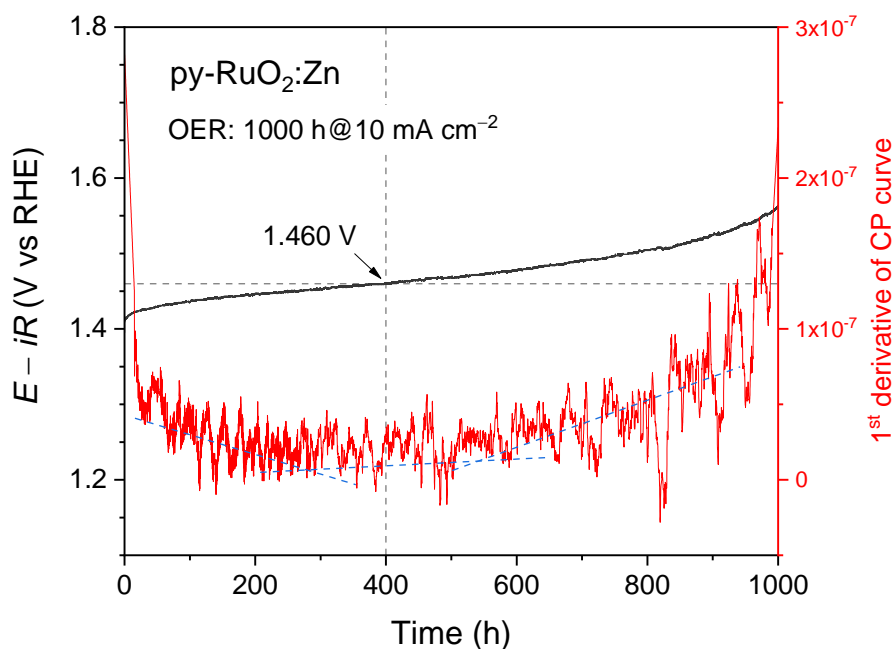

**Supplementary Fig. 37 | CP curve and its 1<sup>st</sup> derivative curve for OER stability test.** The OER stability of the py-RuO<sub>2</sub>:Zn catalyst was measured at 10 mA cm<sup>-2</sup> for 1000 h in 0.5 M H<sub>2</sub>SO<sub>4</sub>. The value of 1.460 V is to guide the approximate inflection region on the curve.

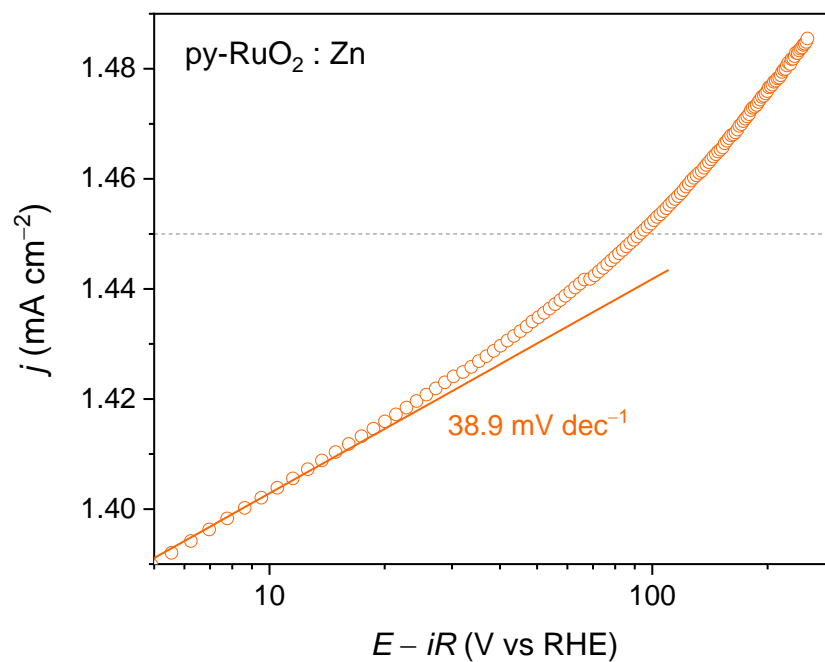

**Supplementary Fig. 38 | Tafel slope for OER on the py-RuO<sub>2</sub>:Zn catalyst in O<sub>2</sub>-saturated 0.5 M H<sub>2</sub>SO<sub>4</sub> solution.**

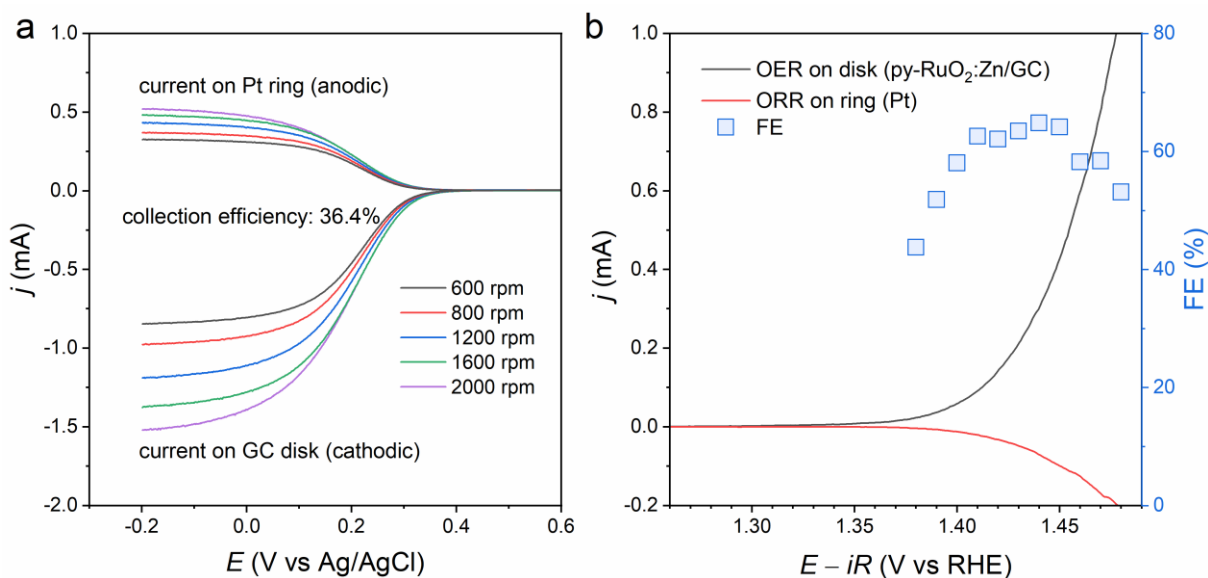

**Supplementary Fig. 39 | OER process investigations at low overpotentials using a rotating ring-disk (Pt-GC) electrode (RRDE).** (a) Calibration of the collection efficiency of RRDE using the  $\text{Fe}(\text{CN})_6^{3-}/\text{Fe}(\text{CN})_6^{4-}$  redox couple in Ar-saturated solution of 0.1 M  $\text{KNO}_3$  and 10 mM  $\text{K}_3\text{Fe}(\text{CN})_6$ . Pt ring potential was held at 0.8 V vs Ag/AgCl. (b) Disk and ring currents collected in the RRDE measurement for OER on the py- $\text{RuO}_2\text{:Zn}$  catalyst in Ar-saturated solution of 0.5 M  $\text{H}_2\text{SO}_4$ , together with the calculated faradaic efficiency (FE) of OER. The catalyst with a loading of  $15 \mu\text{g cm}^{-2}$  was dispersed on the GC disk electrode. Pt ring potential was held at 0.1 V vs RHE, while a potential scan rate of  $2 \text{ mV s}^{-1}$  was performed on the disk electrode. The RRDE was operated at a constant rotation rate of 1600 rpm. The corresponding faradaic efficiency of OER measured by RRDE can be calculated as  $\text{FE}_{\text{OER}} = i_{\text{ring}}/(i_{\text{disk}} \times N)$ , where  $i_{\text{ring}}$  and  $i_{\text{disk}}$  are the measured current on disk and ring electrodes, respectively, and  $N$  is the collection efficiency of RRDE, assuming only a  $4e^-$  ORR process existing on the Pt ring electrode.

In this work, an overpotential of 173 mV at  $10 \text{ mA cm}^{-2}$  was observed on the LSV curve of OER for the Zn-doped  $\text{RuO}_2$  (py- $\text{RuO}_2\text{:Zn}$ ) catalyst, which was about 200 mV lower than that for the commercial  $\text{RuO}_2$  catalyst. We then studied the electrode process at low potentials around 1.40  $\text{V}_{\text{RHE}}$  using a rotating ring-disk (Pt-GC) electrode (RRDE, E7R9PTGC from PINE Research Instrum.) setup to understand whether it was the  $4e^-$  oxidation of water to  $\text{O}_2$ . Collection efficiency of the RRDE ( $N$ ) was first calibrated with the  $\text{Fe}(\text{CN})_6^{3-}/\text{Fe}(\text{CN})_6^{4-}$  redox couple (Supplementary Fig. 39a). The measured value was  $N = 36.4\%$ , well agreeing with the parameter, 37%, provided by the manufacturer. RRDE measurement of OER was then performed on the py- $\text{RuO}_2\text{:Zn}$  catalyst with a reduced loading of  $15 \mu\text{g cm}^{-2}$  to minimize the disturbance from  $\text{O}_2$  bubble accumulation.<sup>3</sup> As shown in Supplementary Fig. 39b, anodic current appeared on the catalyst loaded GC disk



electrode when the potential swept to about 1.35 V. Meanwhile, clear cathodic current was observed on the Pt ring, indicating an explicit reduction of the products released from the disk electrode. The products could be the O<sub>2</sub>, dissolved Ru cations, and/or H<sub>2</sub>O<sub>2</sub>. In the stability test at 10 mA cm<sup>-2</sup> we have found a good stability number (molar ratio of the evolved O<sub>2</sub> to the dissolved Ru element) of the py-RuO<sub>2</sub>:Zn catalyst (Fig. 3e, lower plot in the main text). Thus, the contribution of Ru dissolution/reduction to the anodic/cathodic current on the disk/ring electrodes would be negligible. For the possible production of H<sub>2</sub>O<sub>2</sub>, Nørskov and colleagues recently reported a 2e<sup>-</sup> oxidation path of water to H<sub>2</sub>O<sub>2</sub> in addition to the 4e<sup>-</sup> path to O<sub>2</sub> (i.e., OER). However, they also found that the OER path was thermodynamically more favorable on RuO<sub>2</sub>,<sup>4</sup> consistent with the previous research from Dousikou and co-authors who found an electrooxidation of H<sub>2</sub>O<sub>2</sub> on RuO<sub>2</sub> beginning at potentials around 1.0 V, negative to the standard thermodynamic potential of OER.<sup>5</sup> Therefore, it seems unlikely that the 2e<sup>-</sup> oxidation of water to H<sub>2</sub>O<sub>2</sub> has contributed to the observed current on the disk.

We further calculated the corresponding faradaic efficiency of OER ( $FE_{OER} = i_{ring}/(i_{disk} \times N)$ , assuming only a 4e<sup>-</sup> ORR process existing on the Pt ring electrode). As shown in Supplementary Fig. 40b, a volcanic trend in the  $FE_{OER}$  was found with a maximum value of about 65%. Obviously, the measured  $FE_{OER}$  were generally lower than the expected  $FE_{OER} = 100\%$ . The deviation probably stems from two sources: (i) the low efficient mass transfer of the produced O<sub>2</sub> from the ring to the disk, attributed to the slow kinetics of O<sub>2</sub> gas dissolution; (ii) the reduced Pt ring activity for ORR, due to the deposition of dissolved Ru on the Pt surface. During the RRDE test, a part of the O<sub>2</sub> product may accumulate on the surface of catalyst due to the slow kinetics of O<sub>2</sub> gas dissolution, thereby reducing the amount of dissolved O<sub>2</sub> that can transfer to the ring electrode and the related  $FE_{OER}$ . But with the potential increasing more O<sub>2</sub> was produced, alleviating the impact of O<sub>2</sub> accumulation. Thus, there was a gradual increase of  $FE_{OER}$  (the left branch of the  $FE_{OER}$  plot). However, at more positive potentials the formation and release of O<sub>2</sub> bubble was accelerated. As a competitive process of oxygen dissolution, it would inevitably impair the measurement of  $FE_{OER}$  (the right branch of the  $FE_{OER}$  plot).<sup>3</sup> In addition, the dissolved Ru from the catalyst (disk) can be also reduced on the Pt ring electrode. It was reported that the deposition of Ru has detrimental impact on the ORR activity of the Pt ring electrode, although the amount of Ru was small.<sup>6</sup> In short, the results of RRDE more support the observed anodic process as the 4e<sup>-</sup> oxidation of water to oxygen, *i.e.*, OER, rather than other water oxidation processes.

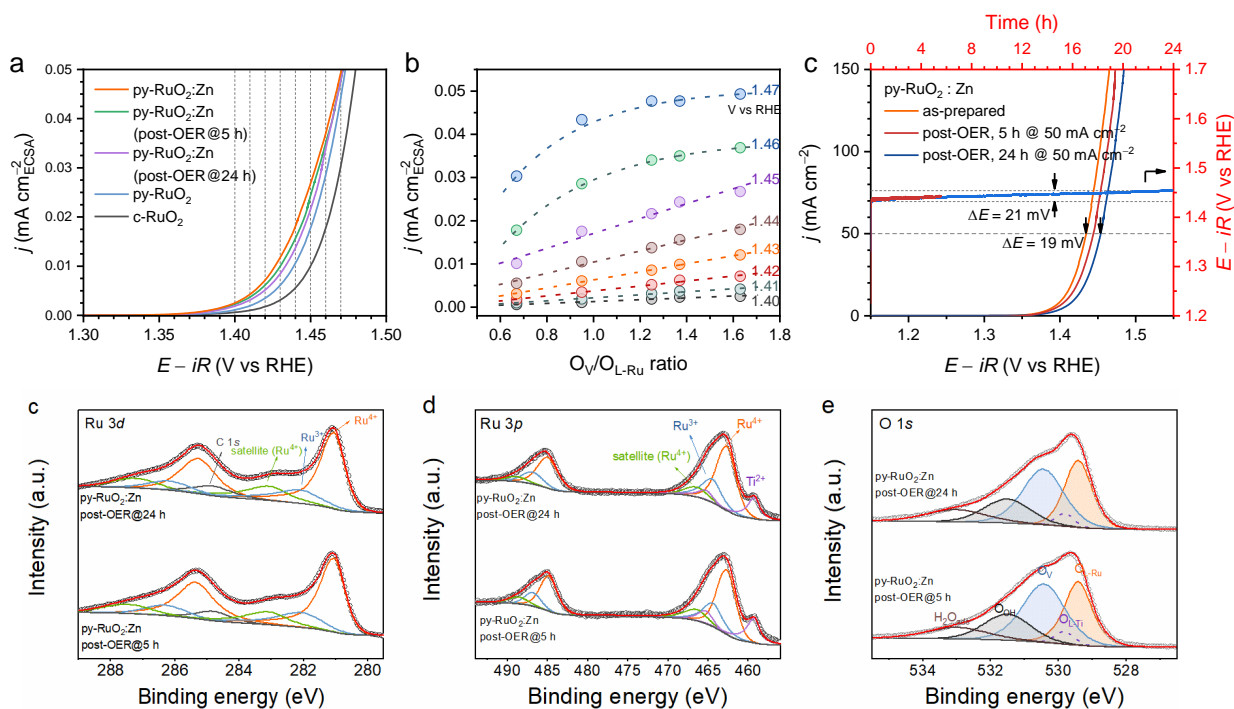

**Supplementary Fig. 40 | OER performance characterization and XPS analysis of catalysts.**

(a) ECSA normalized LSV curves for OER on py-RuO<sub>2</sub>:Zn, py-RuO<sub>2</sub>, and c-RuO<sub>2</sub> catalysts, together with two py-RuO<sub>2</sub>:Zn samples that have been aged at 50 mA cm<sup>-2</sup> for 5 h and 24 h. (b) The dependence of specific OER current density on the concentration of V<sub>O</sub> defects (O<sub>V</sub>/O<sub>L-Ru</sub> ratio) at given electrode potentials. (c) LSV and CP curves of as-prepared py-RuO<sub>2</sub>:Zn catalyst following acidic OER tests for 5 h and 24 h at 50 mA cm<sup>-2</sup>. Core-level (d) Ru 3d, (e) Ru 3p, and (f) O 1s XPS spectra on the py-RuO<sub>2</sub>:Zn catalysts post OER test at 50 mA cm<sup>-2</sup> for 5 h and 24 h in 0.5 M H<sub>2</sub>SO<sub>4</sub> solution.

To experimentally validate the key role of V<sub>O</sub> defects in OER activity, specific current densities determined from ECSA-normalized LSV curves were plotted against the V<sub>O</sub> concentrations (O<sub>V</sub>/O<sub>L-Ru</sub> ratio) measured by XPS. Several further reference samples were prepared, py-RuO<sub>2</sub>:Zn (post-OER@5 h) and py-RuO<sub>2</sub>:Zn (post-OER@24 h), corresponding to the py-RuO<sub>2</sub>:Zn catalysts after OER for 5 h and 24 h at a high current density of 50 mA cm<sup>-2</sup>, respectively (Supplementary Fig. 40c). XPS results reveal a slight decrease in the concentrations of V<sub>O</sub> defects and Ru<sup>3+</sup> species on the aged samples. The ECSA normalized LSV curves are displayed in Supplementary Fig. 40a, from which the specific current densities at different potentials were obtained and plotted in Supplementary Fig. 40b. Obviously, there is strong dependence of the current density on the V<sub>O</sub> defect concentration, with a good linear relationship established at potentials lower than 1.45 V.

Below 1.45 V, an increase of  $V_O$  defect concentration resulted in enhanced OER activity. When reaction potential was increased to 1.46 V or higher, the linear relationship failed, with the OER activity approaching a limit as the concentration of  $V_O$  defects increased. We further noticed that the value of 1.46 V is identical to the threshold potential ( $\sim 1.46$  V) for the rapid dissolution of Ru from the py-RuO<sub>2</sub>:Zn catalyst. Hence, the increased Ru dissolution at potentials of 1.46 V and above breaks the linear relationship between OER activity and  $V_O$  defect concentration. These observations allow us to conclude that  $V_O$  defects play a critical role in catalyzing OER on the py-RuO<sub>2</sub>:Zn catalyst.

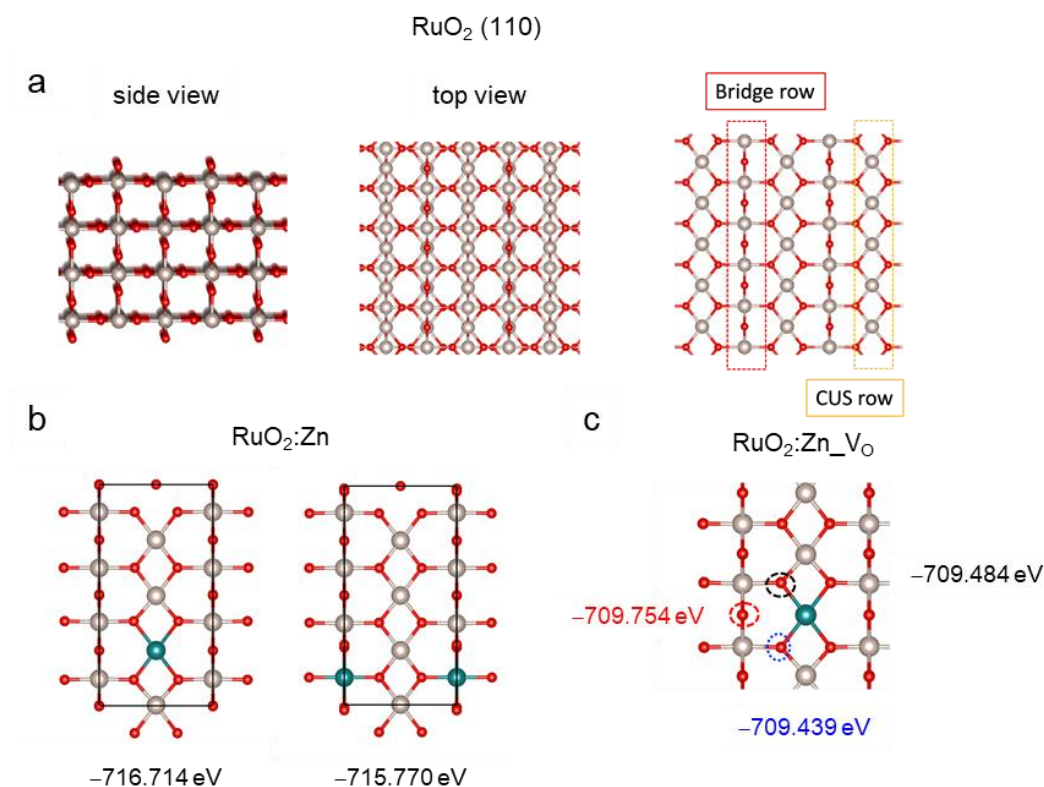

**Supplementary Fig. 41 | Optimized structures of catalysts.** (a) pristine RuO<sub>2</sub> (110) surface (side view, top view, and Ru sites with different coordination), (b) Zn doped RuO<sub>2</sub> (RuO<sub>2</sub>:Zn) surface, and V<sub>O</sub>-containing RuO<sub>2</sub>:Zn (RuO<sub>2</sub>:Zn\_V<sub>O</sub>) surface.

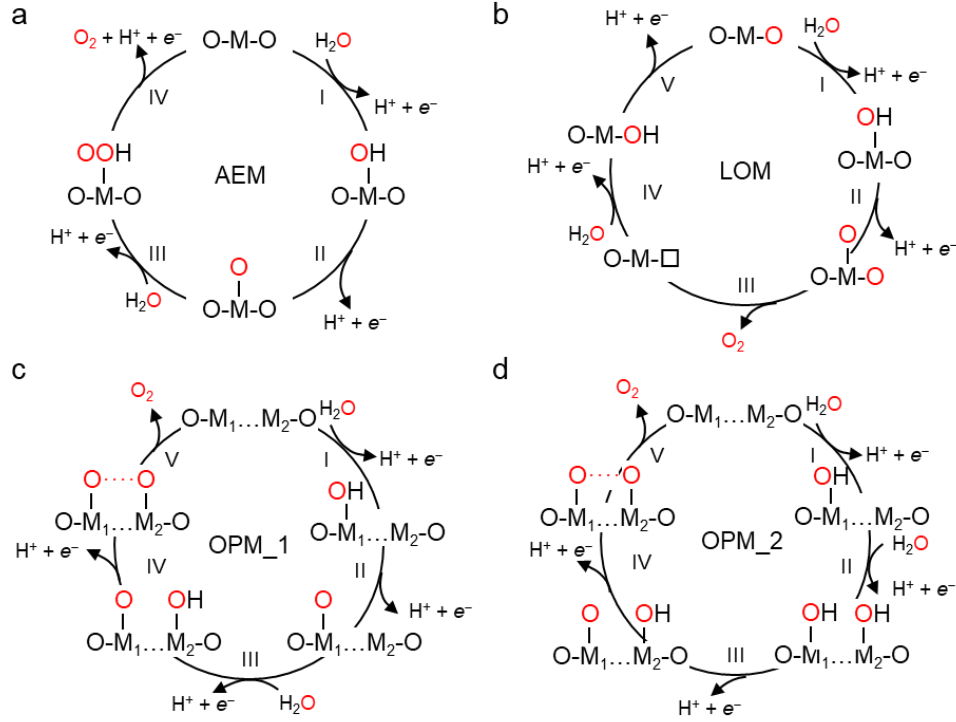

**Supplementary Fig. 42 | OER mechanisms used for theoretic calculation.** The different reaction pathways of OER proceeds with the four electron-proton transfers were considered as:

The adsorbate evolution mechanism (AEM):<sup>7</sup>

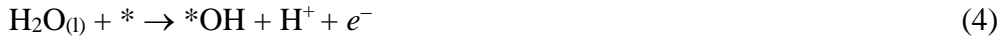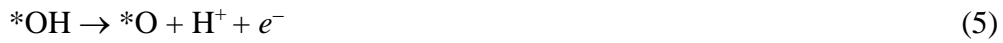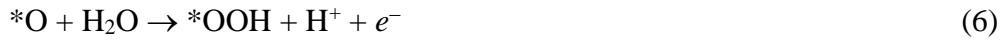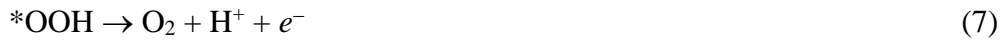

$$\Delta G_1 = \Delta G_{\text{OH}} \quad (8)$$

$$\Delta G_2 = \Delta G_{\text{O}} - \Delta G_{\text{OH}} \quad (9)$$

$$\Delta G_3 = \Delta G_{\text{OOH}} - \Delta G_{\text{O}} \quad (10)$$

$$\Delta G_4 = 4.92 - \Delta G_{\text{OOH}} \quad (11)$$

$$\Delta G_{\text{max}} = \max(\Delta G_1, \Delta G_2, \Delta G_3, \Delta G_4) \quad (12)$$

$$\Delta G_{\text{OH}} = E_{\text{slab,OH}} - E_{\text{slab}} - (E_{\text{H}_2\text{O}} - \frac{1}{2}E_{\text{H}_2}) \quad (13)$$

$$\Delta G_{\text{O}} = E_{\text{slab,O}} - E_{\text{slab}} - (E_{\text{H}_2\text{O}} - E_{\text{H}_2}) \quad (14)$$

$$\Delta G_{\text{OOH}} = E_{\text{slab,OOH}} - E_{\text{slab}} - (2E_{\text{H}_2\text{O}} - \frac{3}{2}E_{\text{H}_2}) \quad (15)$$

The free energy of  $\text{H}_2\text{O}$  was computed at 0.035 bar and 298 K.

The lattice oxygen mechanism (LOM):<sup>7</sup>

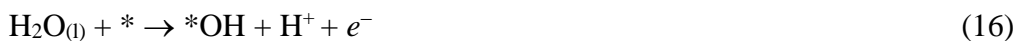

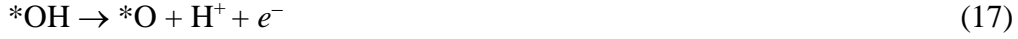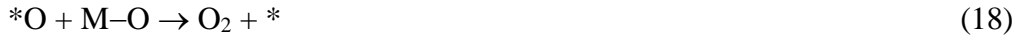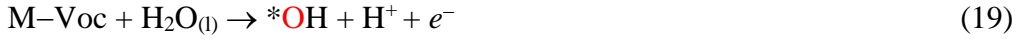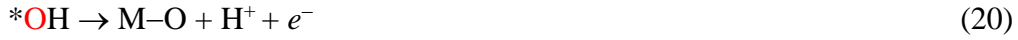

Here, the  $*\text{OH}$  in (16) and (17) have the  $\text{O}$  as the lattice  $\text{O}$ .

$$\Delta G_{1'} = \Delta G_{\text{OH}} \quad (21)$$

$$\Delta G_{2'} = \Delta G_{\text{O}} - \Delta G_{\text{OH}} \quad (22)$$

$$\Delta G_{3'} = \Delta G_{\text{OH}} - \Delta G_{\text{O}} \quad (23)$$

$$\Delta G_{4'} = 4.92 - \Delta G_{\text{OH}} \quad (24)$$

$$\Delta G_{\text{max}} = \max(\Delta G_{1'}, \Delta G_{2'}, \Delta G_{3'}, \Delta G_{4'}) \quad (25)$$

$$\Delta G_{\text{OH}} = E_{\text{slab,OH}} - E_{\text{slab}} - (E_{\text{H}_2\text{O}} - \frac{1}{2}E_{\text{H}_2}) \quad (26)$$

$$\Delta G_{\text{O}} = E_{\text{slab,O}} - E_{\text{slab}} - (E_{\text{H}_2\text{O}} - E_{\text{H}_2}) \quad (27)$$

$$\Delta G_{\text{OH}} = E_{\text{slab,OH}} - E_{\text{slab}} + E_{\text{O}_2} - (2E_{\text{H}_2\text{O}} - \frac{3}{2}E_{\text{H}_2}) \quad (28)$$

The free energy of  $\text{O}_2$  was computed from the reaction  $\text{H}_2\text{O} \rightarrow \text{H}_2 + \text{O}_2$

The dual site mechanism, also known as oxide path mechanism (OPM):<sup>8</sup>

OPM\_1:

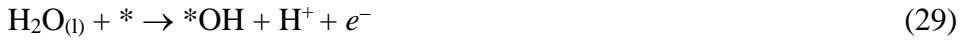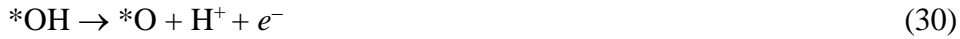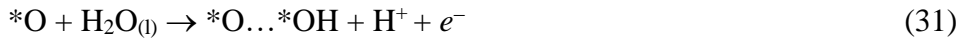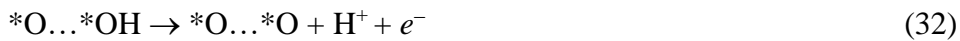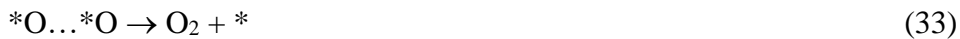

$$\Delta G_{1''} = \Delta G_{\text{OH}} \quad (34)$$

$$\Delta G_{2''} = \Delta G_{\text{O}} - \Delta G_{\text{OH}} \quad (35)$$

$$\Delta G_{3''} = \Delta G_{\text{O} \dots \text{OH}} - \Delta G_{\text{O}} \quad (36)$$

$$\Delta G_{4''} = 4.92 - \Delta G_{\text{O} \dots \text{OH}} \quad (37)$$

$$\Delta G_{\text{max}} = \max(\Delta G_{1''}, \Delta G_{2''}, \Delta G_{3''}, \Delta G_{4''}) \quad (38)$$

$$\Delta G_{\text{OH}} = E_{\text{slab,OH}} - E_{\text{slab}} - (E_{\text{H}_2\text{O}} - \frac{1}{2}E_{\text{H}_2}) \quad (39)$$

$$\Delta G_{\text{O}} = E_{\text{slab,O}} - E_{\text{slab}} - (E_{\text{H}_2\text{O}} - E_{\text{H}_2}) \quad (40)$$

$$\Delta G_{\text{O} \dots \text{OH}} = E_{\text{slab,O} \dots \text{OH}} - E_{\text{slab}} - (2E_{\text{H}_2\text{O}} - \frac{3}{2}E_{\text{H}_2}) \quad (41)$$

OPM\_2

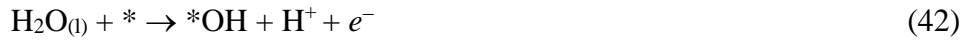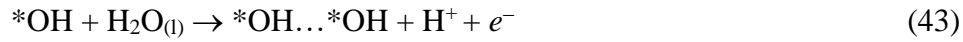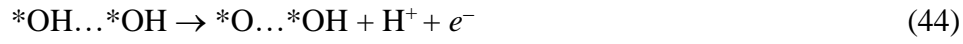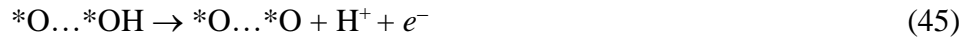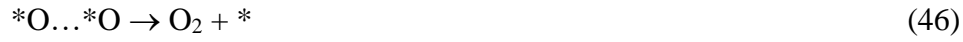

$$\Delta G_{1''''} = \Delta G_{\text{OH}} \quad (47)$$

$$\Delta G_{2''''} = \Delta G_{\text{O}} - \Delta G_{\text{OH}} \quad (48)$$

$$\Delta G_{3''''} = \Delta G_{\text{O}\dots\text{OH}} - \Delta G_{\text{O}} \quad (49)$$

$$\Delta G_{4''''} = 4.92 - \Delta G_{\text{O}\dots\text{OH}} \quad (50)$$

$$\Delta G_{\text{max}} = \max(\Delta G_{1''''}, \Delta G_{2''''}, \Delta G_{3''''}, \Delta G_{4''''}) \quad (51)$$

$$\Delta G_{\text{OH}} = E_{\text{slab,OH}} - E_{\text{slab}} - (E_{\text{H}_2\text{O}} - \frac{1}{2}E_{\text{H}_2}) \quad (52)$$

$$\Delta G_{\text{OH}\dots\text{OH}} = E_{\text{slab,OH}\dots\text{OH}} - E_{\text{slab}} - (E_{\text{H}_2\text{O}} - E_{\text{H}_2}) \quad (53)$$

$$\Delta G_{\text{O}\dots\text{OH}} = E_{\text{slab,O}\dots\text{OH}} - E_{\text{slab}} - (2E_{\text{H}_2\text{O}} - \frac{3}{2}E_{\text{H}_2}) \quad (54)$$

the over potential is computed as:

$$\eta = \frac{\Delta G_{\text{max}}}{e} - 1.23 \text{ V} \quad (55)$$

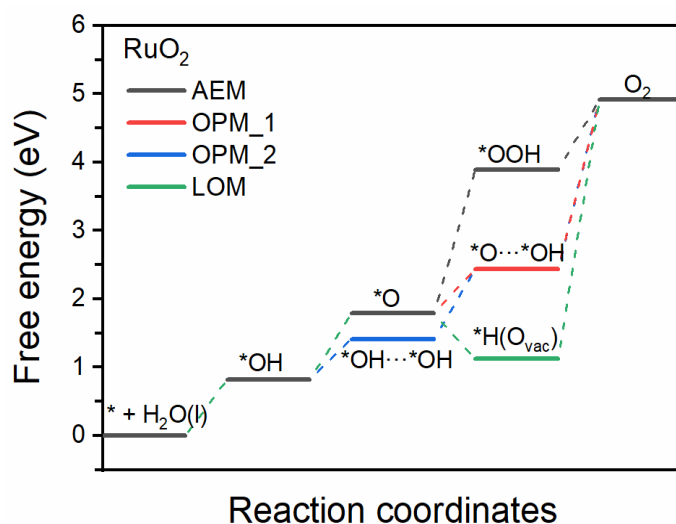

Supplementary Fig. 43 | Calculated free-energy diagrams of different OER paths on the RuO<sub>2</sub> surface.

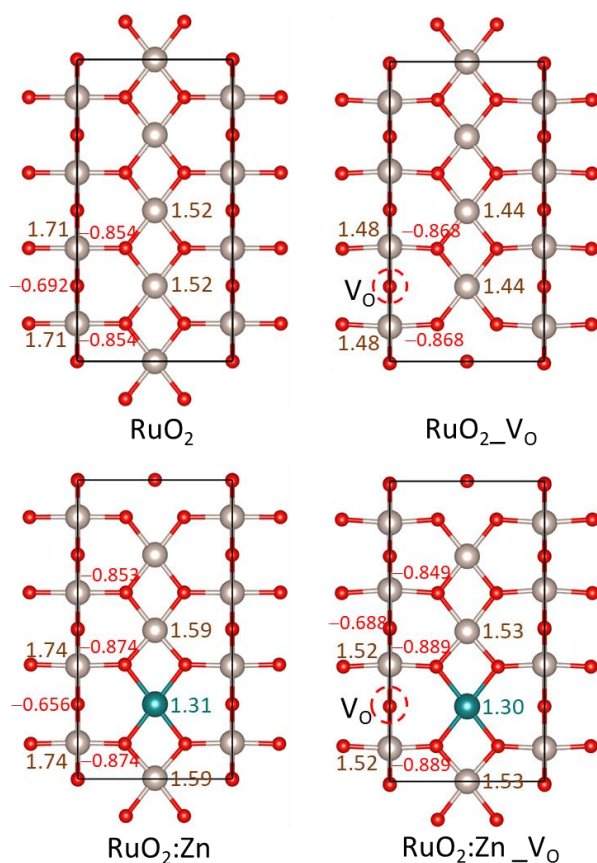

Supplementary Fig. 44 | Bader charge analysis of Ru (brown), Zn (dark cyan), and oxygen (red) sites on the surface of different samples.

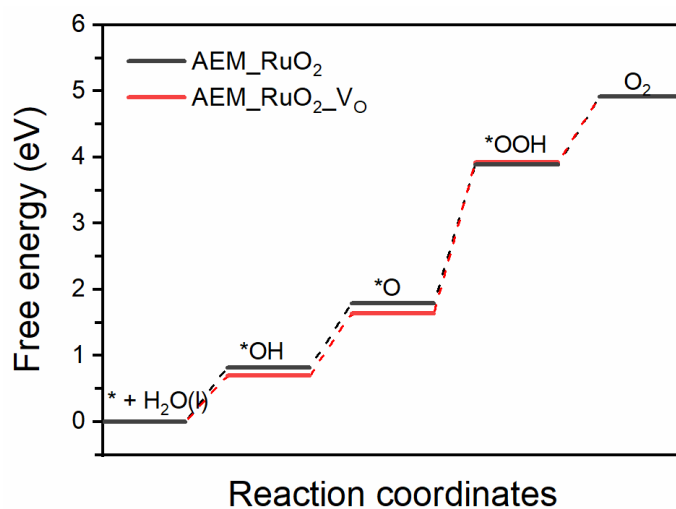

**Supplementary Fig. 45 | Calculated free-energy diagrams of AEM paths on the RuO<sub>2</sub> and RuO<sub>2</sub>\_V<sub>o</sub> surface.**

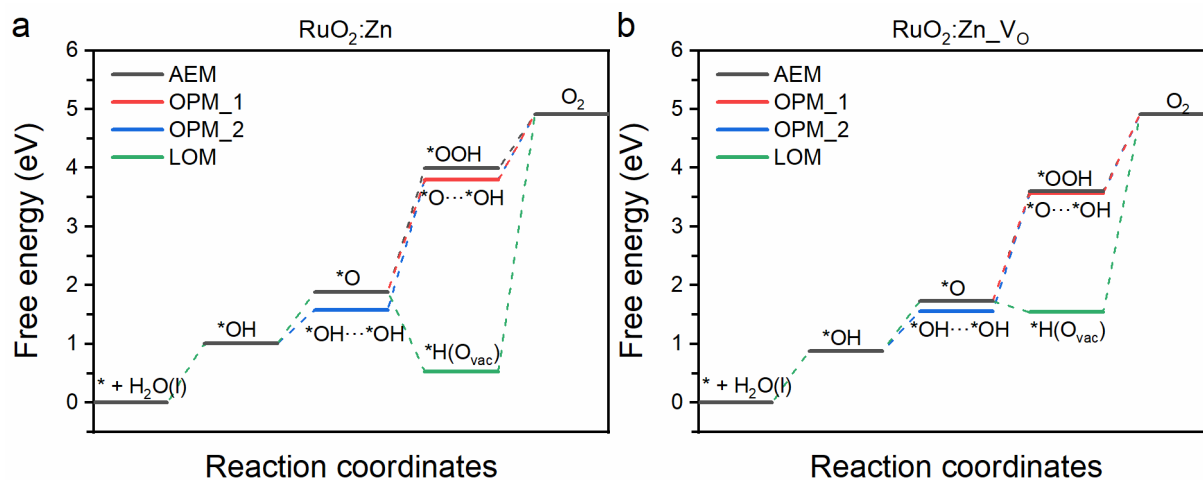

**Supplementary Fig. 46 | Calculated free-energy diagrams of different OER paths on different catalyts. (a) RuO<sub>2</sub>:Zn and (b) RuO<sub>2</sub>:Zn\_V<sub>o</sub> surfaces.**



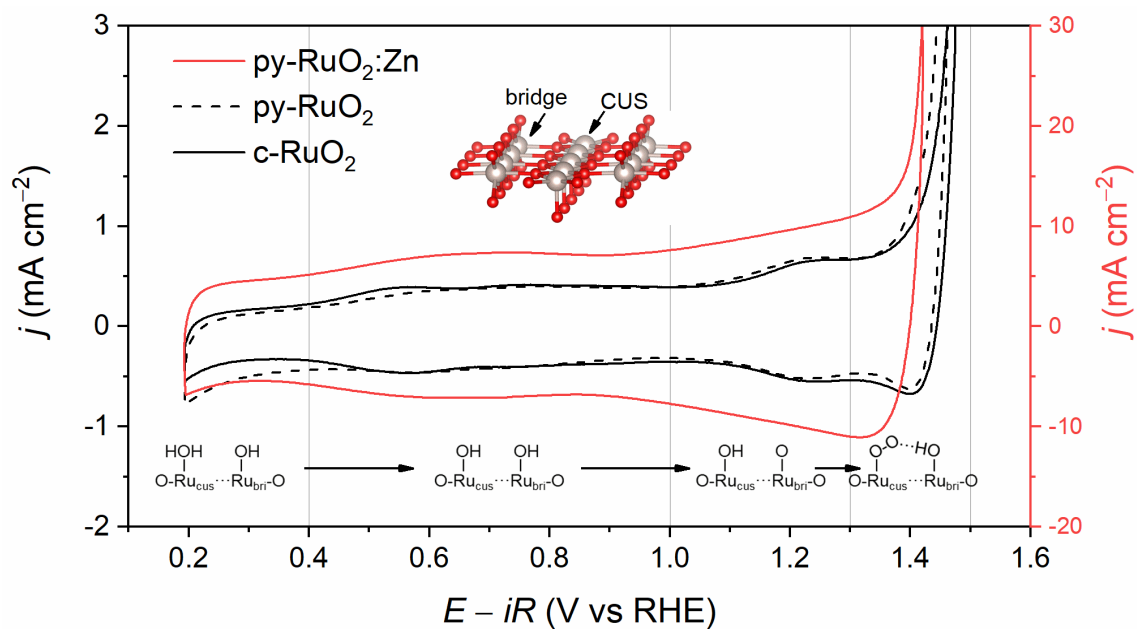

**Supplementary Fig. 47 | CV curves of py-RuO<sub>2</sub>:Zn, py-RuO<sub>2</sub>, and c-RuO<sub>2</sub> catalysts in 0.5 M H<sub>2</sub>SO<sub>4</sub> solution. Potential scan rate: 50 mV s<sup>-1</sup>.**

**Supplementary Table 1** | The contents of Ru and Zn in the catalysts determined by ICP-MS.<sup>a</sup>

| py-RuO <sub>2</sub> : Zn | Ru<br>/μg                    | Zn<br>/μg                   | Zn/Ru atomic ratio       |           |                          |
|--------------------------|------------------------------|-----------------------------|--------------------------|-----------|--------------------------|
|                          |                              |                             | ICP-MS                   | EDS (SEM) | EDS (HRTEM) <sup>c</sup> |
| before acid etching      | 289.30 (303.21) <sup>b</sup> | 102.11 (98.07) <sup>b</sup> | 0.546 (0.5) <sup>b</sup> | 0.566     | —                        |
| after acid etching       | 260.01                       | 10.75                       | 0.0639                   | 0.0515    | 0.0546                   |

<sup>a</sup>The average value of 5 parallel samples. The mass values reported in this table are based on a geometric area of 0.5 cm<sup>2</sup> for the catalyst coating on the Ti plate.

<sup>b</sup>The values in parentheses are calculated based on the molar amount of precursors.

<sup>c</sup>The value was obtained on a single nanowire measured by EDS during the HADDF-STEM analyses.

**Supplementary Table 2** | Results of deconvolution of the Ru 3p<sub>3/2</sub> and O 1s XPS spectra of different catalysts.

|                                                         | Ru 3p <sub>3/2</sub>           |                                                   |      | O 1s                        |                                                    |      |
|---------------------------------------------------------|--------------------------------|---------------------------------------------------|------|-----------------------------|----------------------------------------------------|------|
|                                                         | BE/eV                          | Proportion <sup>a</sup><br>(to Ru <sup>4+</sup> ) | FWHM | BE/eV                       | Proportion <sup>a</sup><br>(to O <sub>L-Ru</sub> ) | FWHM |
| py-RuO <sub>2</sub> :Zn                                 | 462.82 (Ru <sup>4+</sup> )     | 1.00                                              | 2.70 | 529.42 (O <sub>L-Ru</sub> ) | 1.00                                               | 0.86 |
|                                                         | 464.53 (Ru <sup>3+</sup> )     | 0.55                                              | 2.68 | 530.45 (O <sub>V</sub> )    | 1.63                                               | 1.50 |
|                                                         | 466.45 (Sat. <sub>Ru4+</sub> ) | 0.25                                              | 3.20 | 531.50 (O <sub>OH</sub> )   | 0.72                                               | 1.70 |
| py-RuO <sub>2</sub>                                     | 462.70 (Ru <sup>4+</sup> )     | 1.00                                              | 2.68 | 529.42 (O <sub>L-Ru</sub> ) | 1.00                                               | 0.86 |
|                                                         | 464.50 (Ru <sup>3+</sup> )     | 0.31                                              | 2.65 | 530.48 (O <sub>V</sub> )    | 0.95                                               | 1.50 |
|                                                         | 466.47 (Sat. <sub>Ru4+</sub> ) | 0.26                                              | 3.22 | 531.49 (O <sub>OH</sub> )   | 0.40                                               | 1.68 |
| c-RuO <sub>2</sub>                                      | 462.45 (Ru <sup>4+</sup> )     | 1.00                                              | 2.75 | 529.42 (O <sub>L-Ru</sub> ) | 1.00                                               | 0.85 |
|                                                         | 464.32 (Ru <sup>3+</sup> )     | 0.25                                              | 2.72 | 530.47 (O <sub>V</sub> )    | 0.67                                               | 1.53 |
|                                                         | 466.31 (Sat. <sub>Ru4+</sub> ) | 0.20                                              | 3.35 | 531.49 (O <sub>OH</sub> )   | 0.28                                               | 1.68 |
| py-RuO <sub>2</sub> :Zn <sup>b</sup><br>(post OER)      | 462.78 (Ru <sup>4+</sup> )     | 1.00                                              | 2.75 | 529.42 (O <sub>L-Ru</sub> ) | 1.00                                               | 0.98 |
|                                                         | 464.55 (Ru <sup>3+</sup> )     | 0.40                                              | 2.73 | 530.43 (O <sub>V</sub> )    | 1.18                                               | 1.48 |
|                                                         | 466.57 (Sat. <sub>Ru4+</sub> ) | 0.25                                              | 3.30 | 531.47 (O <sub>OH</sub> )   | 0.62                                               | 1.67 |
| py-RuO <sub>2</sub> :Zn <sup>c</sup><br>(post-OER@5 h)  | 462.80 (Ru <sup>4+</sup> )     | 1.00                                              | 2.75 | 529.42 (O <sub>L-Ru</sub> ) | 1.00                                               | 0.96 |
|                                                         | 464.57 (Ru <sup>3+</sup> )     | 0.46                                              | 2.70 | 530.44 (O <sub>V</sub> )    | 1.36                                               | 1.53 |
|                                                         | 466.58 (Sat. <sub>Ru4+</sub> ) | 0.24                                              | 3.30 | 531.51 (O <sub>OH</sub> )   | 0.66                                               | 1.70 |
| py-RuO <sub>2</sub> :Zn <sup>c</sup><br>(post-OER@24 h) | 462.80 (Ru <sup>4+</sup> )     | 1.00                                              | 2.75 | 529.42 (O <sub>L-Ru</sub> ) | 1.00                                               | 0.95 |
|                                                         | 464.56 (Ru <sup>3+</sup> )     | 0.43                                              | 2.68 | 530.45 (O <sub>V</sub> )    | 1.25                                               | 1.50 |
|                                                         | 466.57 (Sat. <sub>Ru4+</sub> ) | 0.20                                              | 3.30 | 531.51 (O <sub>OH</sub> )   | 0.60                                               | 1.70 |

<sup>a</sup>The proportion is calculated based on the peak area of the Ru<sup>3+</sup> and Ru<sup>4+</sup> species.

<sup>b</sup>After a stability test of OER at 10 mA cm<sup>-2</sup> for 350 h.

<sup>c</sup>After the stability test of OER at 50 mA cm<sup>-2</sup> for different time.

**Supplementary Table 3** | Summary of the impedance fitting data for py-RuO<sub>2</sub>:Zn and py-RuO<sub>2</sub> catalysts in O<sub>2</sub>-saturated 0.5 M H<sub>2</sub>SO<sub>4</sub>.

| Potential<br>(V vs RHE) | $R_s$ ( $\Omega$ )      |                     | $R_f$ ( $\Omega$ )      |                     | CPE <sub>f</sub> (mF)   |                     | $R_{ct}$ ( $\Omega$ )   |                     | CPE <sub>ct</sub> (mF)  |                     |
|-------------------------|-------------------------|---------------------|-------------------------|---------------------|-------------------------|---------------------|-------------------------|---------------------|-------------------------|---------------------|
|                         | py-RuO <sub>2</sub> :Zn | py-RuO <sub>2</sub> | py-RuO <sub>2</sub> :Zn | py-RuO <sub>2</sub> | py-RuO <sub>2</sub> :Zn | py-RuO <sub>2</sub> | py-RuO <sub>2</sub> :Zn | py-RuO <sub>2</sub> | py-RuO <sub>2</sub> :Zn | py-RuO <sub>2</sub> |
| 1.20                    | 3.672                   | 3.209               | 1.346                   | 5.163               | 286.69                  | 61.91               | 24358                   | 53538               | 161.60                  | 14.47               |
| 1.30                    | 3.696                   | 3.226               | 1.231                   | 5.238               | 284.55                  | 58.82               | 4148                    | 36207               | 179.84                  | 15.72               |
| 1.325                   | 3.690                   | 3.211               | 1.219                   | 5.723               | 286.36                  | 59.15               | 1751                    | 15826               | 186.01                  | 15.51               |
| 1.35                    | 3.731                   | 3.216               | 1.031                   | 4.609               | 251.23                  | 61.01               | 296.6                   | 2576                | 195.43                  | 16.13               |
| 1.375                   | 3.762                   | 3.241               | 0.997                   | 3.109               | 252.84                  | 56.29               | 43.15                   | 519.2               | 210.17                  | 17.42               |
| 1.40                    | 3.760                   | 3.244               | 1.101                   | 2.685               | 298.26                  | 66.52               | 9.047                   | 114.7               | 238.01                  | 20.58               |
| 1.42                    | 4.040                   | 3.216               | 1.268                   | 2.403               | 321.89                  | 95.44               | 2.930                   | 42.4                | 301.09                  | 24.30               |
| 1.44                    | 4.045                   | 3.210               | 0.997                   | 2.188               | 245.43                  | 107.34              | 1.813                   | 22.91               | 314.29                  | 27.68               |
| 1.46                    | 4.071                   | 3.201               | 0.802                   | 1.781               | 218.90                  | 189.30              | 1.296                   | 11.04               | 312.64                  | 29.85               |

**Supplementary Table 4** | Summary of recently reported Ru-based catalysts for acidic water oxidation.

| Catalysts                                                                | $\eta_{10}$<br>(mV) | Tafel slope<br>(mV dec <sup>-1</sup> ) | Mass activity@ $\eta$<br>(mA mg <sup>-1</sup> @mV) | Stability<br>under 10 mA cm <sup>-2</sup><br>( $\Delta E$ @duration time) | Electrolytes                         | References                                                                |
|--------------------------------------------------------------------------|---------------------|----------------------------------------|----------------------------------------------------|---------------------------------------------------------------------------|--------------------------------------|---------------------------------------------------------------------------|
| py-RuO <sub>2</sub> :Zn nanowires array                                  | 173                 | 41.2                                   | 881@300                                            | 60 mV@500 h<br>153 mV@1000 h                                              | 0.5 M H <sub>2</sub> SO <sub>4</sub> | This work                                                                 |
| Bi <sub>1.5</sub> Er <sub>0.5</sub> Ru <sub>2</sub> O <sub>7</sub>       | 180                 | 51.3                                   | –                                                  | –@100 h                                                                   | 0.1 M HClO <sub>4</sub>              | Nat. Commun. <b>2022</b> , <i>13</i> , 4106 <sup>9</sup>                  |
| C-RuO <sub>2</sub> -RuSe                                                 | 212                 | 49.5                                   | –                                                  | –@50 h                                                                    | 0.5 M H <sub>2</sub> SO <sub>4</sub> | Chem <b>2022</b> , <i>8</i> , 1673–1687 <sup>10</sup>                     |
| RuO <sub>2</sub> -WC NPs                                                 | 347                 | 88.5                                   | 1430@320                                           | –@10 h                                                                    | 0.5 M H <sub>2</sub> SO <sub>4</sub> | Angew. Chem. Int. Ed. <b>2022</b> , <i>61</i> , e202202519 <sup>11</sup>  |
| Mn <sub>0.73</sub> Ru <sub>0.27</sub> O <sub>2-<math>\delta</math></sub> | 208                 | 65.3                                   | 879.2@270                                          | –@10 h                                                                    | 0.5 M H <sub>2</sub> SO <sub>4</sub> | Energy Environ. Sci. <b>2022</b> , <i>15</i> , 2356–2365 <sup>12</sup>    |
| Pt-RuO <sub>2</sub>                                                      | 228                 | 51                                     | –                                                  | –@100 h                                                                   | 0.5 M H <sub>2</sub> SO <sub>4</sub> | Sci. Adv. <b>2022</b> , <i>8</i> , eabl9271 <sup>13</sup>                 |
| Li <sub>x</sub> RuO <sub>2</sub>                                         | 156                 | 83.3                                   | ~253@300                                           | 120 mV@70 h                                                               | 0.5 M H <sub>2</sub> SO <sub>4</sub> | Nat. Commun. <b>2022</b> , <i>13</i> , 3784 <sup>14</sup>                 |
| S <sub>H</sub> -RuCuO NRs                                                | 231                 | 39.7                                   | 783@270                                            | 44 mV@250 h                                                               | 0.5 M H <sub>2</sub> SO <sub>4</sub> | Nano Res. <b>2022</b> , <i>15</i> , 3964–3970 <sup>15</sup>               |
| RuMn                                                                     | ~240                | –                                      | –                                                  | 100 mV@720 h                                                              | 0.5 M H <sub>2</sub> SO <sub>4</sub> | Adv. Funct. Mater. <b>2022</b> , <i>32</i> , 2200131 <sup>16</sup>        |
| RuO <sub>2</sub> /D-TiO <sub>2</sub>                                     | 180                 | 43                                     | –                                                  | –@100 h                                                                   | 0.5 M H <sub>2</sub> SO <sub>4</sub> | ACS Catal. <b>2022</b> , <i>12</i> , 9437–9445 <sup>17</sup>              |
| RuPbO <sub>x</sub>                                                       | 191                 | 39                                     | 593@270                                            | 85 mV@100 h                                                               | 0.5 M H <sub>2</sub> SO <sub>4</sub> | Chin. J. Catal. <b>2022</b> , <i>43</i> , 130–138 <sup>18</sup>           |
| E-Zn-RuO <sub>2</sub>                                                    | 190                 | 50.9                                   | –                                                  | –@60 h                                                                    | 0.5 M H <sub>2</sub> SO <sub>4</sub> | J. Mater. Chem. A <b>2022</b> , <i>10</i> , 16193–16203 <sup>19</sup>     |
| In <sub>0.17</sub> Ru <sub>0.83</sub> O <sub>2</sub>                     | 177                 | 32.6                                   | 1094.9@300                                         | –@20 h                                                                    | 0.5 M H <sub>2</sub> SO <sub>4</sub> | J. Mater. Chem. A <b>2022</b> , <i>10</i> , 3722–3731 <sup>20</sup>       |
| RuMn NSBs                                                                | 196                 | 47.3                                   | –                                                  | –@140 h                                                                   | 0.5 M H <sub>2</sub> SO <sub>4</sub> | Adv. Mater. <b>2021</b> , <i>33</i> , 2105308 <sup>21</sup>               |
| Ru/ $\alpha$ -MnO <sub>2</sub>                                           | 161                 | 29.4                                   | ~431@161                                           | 169 mV@200 h                                                              | 0.1 M HClO <sub>4</sub>              | Nat. Catal. <b>2021</b> , <i>4</i> , 1012–1023 <sup>3</sup>               |
| Na-a/c-RuO <sub>2</sub>                                                  | 205                 | 48.6                                   | ~100@250                                           | –@60 h                                                                    | 0.1 M HClO <sub>4</sub>              | Angew. Chem. Int. Ed. <b>2021</b> , <i>60</i> , 18821–18829 <sup>22</sup> |
| Ru/RuS <sub>2</sub>                                                      | 201                 | 47.2                                   | ~94@300                                            | –@24(i-t) h                                                               | 0.5 M H <sub>2</sub> SO <sub>4</sub> | Angew. Chem. Int. Ed. <b>2021</b> , <i>60</i> , 12328–12334 <sup>23</sup> |
| SrRuIr oxide                                                             | 190                 | 39                                     | 281@270<br>429@300                                 | 43 mV@1500 h                                                              | 0.5 M H <sub>2</sub> SO <sub>4</sub> | J. Am. Chem. Soc. <b>2021</b> , <i>143</i> , 6482–6490 <sup>24</sup>      |
| Ni-Ru@RuO <sub>x</sub>                                                   | 184                 | 44                                     | 315@220                                            | –@30 h                                                                    | 0.5 M H <sub>2</sub> SO <sub>4</sub> | Adv. Energy Mater. <b>2021</b> , <i>11</i> , 2003448 <sup>25</sup>        |
| Y <sub>1.7</sub> Sr <sub>0.3</sub> Ru <sub>2</sub> O <sub>7</sub>        | 264                 | 44.8                                   | 418@270<br>1018@300                                | –@28 h                                                                    | 0.5 M H <sub>2</sub> SO <sub>4</sub> | ACS Nano <b>2021</b> , <i>15</i> , 8537–8548 <sup>26</sup>                |
| RuIr@CoNC                                                                | 223                 | 45                                     | 2041@300                                           | –@40 h                                                                    | 0.5 M H <sub>2</sub> SO <sub>4</sub> | ACS Catal. <b>2021</b> , <i>11</i> , 3402–3413 <sup>27</sup>              |
| RuO <sub>2</sub> nanowires                                               | 224                 | 48                                     | –                                                  | –@12 h                                                                    | 0.1 M HClO <sub>4</sub>              | Adv. Funct. Mater. <b>2021</b> , <i>31</i> , 2007344 <sup>28</sup>        |
| S-RuFeO <sub>x</sub>                                                     | 187                 | 40                                     | 1180@190                                           | 50 mV@1 h                                                                 | 0.1 M HClO <sub>4</sub>              | Adv. Funct. Mater. <b>2021</b> ,                                          |

|                                                                       |      |       |            |             |                                      |                                                                                     |
|-----------------------------------------------------------------------|------|-------|------------|-------------|--------------------------------------|-------------------------------------------------------------------------------------|
| Zn-doped RuO <sub>2</sub>                                             | 206  | 45.6  | –          | –@30 h      | 0.5 M H <sub>2</sub> SO <sub>4</sub> | 2101405 <sup>29</sup><br>ChemNanoMat <b>2021</b> , <i>7</i> , 117–121 <sup>30</sup> |
| Ru/Fe oxide nanoassemblies                                            | 238  | 44.8  | –          | –@9 h       | 0.5 M H <sub>2</sub> SO <sub>4</sub> | Nano Energy <b>2021</b> , <i>84</i> , 105909 <sup>31</sup>                          |
| defect-rich RuO <sub>2</sub> nanosheets                               | 199  | 38.2  | 520@230    | –@6 h       | 0.5 M H <sub>2</sub> SO <sub>4</sub> | Energy Environ. Sci. <b>2020</b> , <i>13</i> , 5143–5151 <sup>32</sup>              |
| Y <sub>1.8</sub> Cu <sub>0.2</sub> Ru <sub>2</sub> O <sub>7-δ</sub>   | ~258 | 52    | –          | –           | 0.5 M H <sub>2</sub> SO <sub>4</sub> | J. Am. Chem. Soc. <b>2020</b> , <i>142</i> , 7883–7888 <sup>33</sup>                |
| W <sub>0.2</sub> Er <sub>0.1</sub> Ru <sub>0.7</sub> O <sub>2-δ</sub> | 168  | 66.8  | 1518.6@275 | 83 mV@500 h | 0.5 M H <sub>2</sub> SO <sub>4</sub> | Nat. Commun. <b>2020</b> , <i>11</i> , 5368 <sup>34</sup>                           |
| RuNi <sub>2</sub> @G-250                                              | 227  | 65    | 57.6@250   | –@24 h      | 0.5 M H <sub>2</sub> SO <sub>4</sub> | Adv. Mater. <b>2020</b> , <i>32</i> , 1908126 <sup>35</sup>                         |
| RuB <sub>2</sub>                                                      | 223  | 39.8  | ~100@250   | 38 mV@10 h  | 0.5 M H <sub>2</sub> SO <sub>4</sub> | ACS Energy Lett. <b>2020</b> , <i>5</i> , 2909–2915 <sup>36</sup>                   |
| Mn-RuO <sub>2</sub>                                                   | 158  | 42.94 | 596.38@270 | 370 mV@10 h | 0.5 M H <sub>2</sub> SO <sub>4</sub> | ACS Catal. <b>2020</b> , <i>10</i> , 1152–1160 <sup>37</sup>                        |
| IrRu@Te                                                               | 220  | 35    | 590@250    | –@20 h      | 0.5 M H <sub>2</sub> SO <sub>4</sub> | ACS Catal. <b>2020</b> , <i>10</i> , 3571–3579 <sup>38</sup>                        |
| Ru nanoparticles                                                      | 202  | 69.6  | ~300@300   | –@10 h      | 0.5 M H <sub>2</sub> SO <sub>4</sub> | ACS Catal. <b>2020</b> , <i>10</i> , 12575–12581 <sup>39</sup>                      |
| Ru <sub>1</sub> -Pt <sub>3</sub> Cu                                   | 220  | ~51.7 | 6615@280   | –@29 h      | 0.1 M HClO <sub>4</sub>              | Nat. Catal. <b>2019</b> , <i>2</i> , 304–313 <sup>40</sup>                          |
| RuCu nanosheets                                                       | 236  | 41    | –          | –@12 h      | 0.5 M H <sub>2</sub> SO <sub>4</sub> | Angew. Chem. Int. Ed. <b>2019</b> , <i>58</i> , 13983–13988 <sup>41</sup>           |
| Co-RuIr ultrafine                                                     | 235  | 66.9  | –          | –@25 h      | 0.1 M HClO <sub>4</sub>              | Adv. Mater., <b>2019</b> , <i>31</i> , 1900510 <sup>42</sup>                        |
| defective RuO <sub>2</sub>                                            | 179  | 36.9  | –          | 19 mV@20 h  | 0.5 M H <sub>2</sub> SO <sub>4</sub> | Adv. Energy Mater. <b>2019</b> , <i>9</i> , 1901313 <sup>43</sup>                   |
| Ruthenate nanosheets                                                  | 255  | 38    | 42@250     | 260 mV@6 h  | 0.1 M HClO <sub>4</sub>              | Adv. Energy Mater. <b>2019</b> , <i>9</i> , 1803795 <sup>44</sup>                   |
| Cr <sub>0.6</sub> Ru <sub>0.4</sub> O <sub>2</sub>                    | 178  | 58    | 229@270    | –@10 h      | 0.5 M H <sub>2</sub> SO <sub>4</sub> | Nat. Commun. <b>2019</b> , <i>10</i> , 162 <sup>45</sup>                            |
| CaCu <sub>3</sub> Ru <sub>4</sub> O <sub>12</sub>                     | 171  | 40    | 1942@270   | 21 mV@24 h  | 0.5 M H <sub>2</sub> SO <sub>4</sub> | Nat. Commun. <b>2019</b> , <i>10</i> , 3809 <sup>46</sup>                           |
| Na-doped SrRuO <sub>3</sub>                                           | 170  | ~40   | –          | –           | 0.1 M HClO <sub>4</sub>              | Nat. Commun. <b>2019</b> , <i>10</i> , 2041 <sup>47</sup>                           |
| RuTe <sub>2</sub> nanorods                                            | 245  | 47    | –          | –@24 h      | 0.5 M H <sub>2</sub> SO <sub>4</sub> | Nat. Commun. <b>2019</b> , <i>10</i> , 5692 <sup>48</sup>                           |
| Ru <sub>1</sub> -N-C                                                  | 267  | 52.6  | 3540@267   | –@30(i-t) h | 0.5 M H <sub>2</sub> SO <sub>4</sub> | Nat. Commun. <b>2019</b> , <i>10</i> , 4849 <sup>49</sup>                           |
| NPC@RuO <sub>2</sub>                                                  | 220  | 68.8  | –          | –@10 h      | 0.5 M H <sub>2</sub> SO <sub>4</sub> | Adv. Funct. Mater. <b>2019</b> , <i>29</i> , 1901154 <sup>50</sup>                  |
| Cu-doped RuO <sub>2</sub>                                             | 188  | 52    | 352@350    | 83 mV@8 h   | 0.5 M H <sub>2</sub> SO <sub>4</sub> | Adv. Mater. <b>2018</b> , <i>30</i> , 1801351 <sup>51</sup>                         |
| Pd-Ru nanoparticles                                                   | 225  | 61    | –          | –@2 h       | 0.1 M HClO <sub>4</sub>              | J. Am. Chem. Soc. <b>2018</b> , <i>140</i> , 12760–12764 <sup>52</sup>              |
| Au-Ru nanoparticles                                                   | 220  | 62    | –          | –           | 0.5 M H <sub>2</sub> SO <sub>4</sub> | Angew. Chem. Int. Ed. <b>2018</b> , <i>57</i> , 10241–10245 <sup>53</sup>           |
| Ru@IrO <sub>x</sub>                                                   | 282  | 69.1  | 644.8@330  | –@24(i-t) h | 0.5 M H <sub>2</sub> SO <sub>4</sub> | Chem <b>2019</b> , <i>5</i> , 445–459 <sup>54</sup>                                 |
| Y <sub>2</sub> [Ru <sub>1.6</sub> Y <sub>0.4</sub> ]O <sub>7-δ</sub>  | ~240 | 37    | ~480@250   | –           | 0.5 M H <sub>2</sub> SO <sub>4</sub> | Angew. Chem. Int. Ed. <b>2018</b> , <i>57</i> , 13877–13881 <sup>55</sup>           |

**Supplementary Table 5** | Summary of Ru dissolution rate of RuO<sub>2</sub>-based catalysts recently reported for acidic water oxidation.

| catalysts                                        | Ru dissolution rate<br>$\mu\text{g cm}_{\text{geo}}^{-2} \text{h}^{-1}$ | Test conditions                                                                                        | References                                                |
|--------------------------------------------------|-------------------------------------------------------------------------|--------------------------------------------------------------------------------------------------------|-----------------------------------------------------------|
| py-RuO <sub>2</sub> :Zn                          | 0.156                                                                   | at 10 mA cm <sup>-2</sup> for 500 h in 0.5 M H <sub>2</sub> SO <sub>4</sub>                            | This work                                                 |
| commercial RuO <sub>2</sub>                      | ~40                                                                     |                                                                                                        |                                                           |
| sputtering-prepared crystalline RuO <sub>2</sub> | ~0.36                                                                   | at ~1.53 V during potential sweeping with 1 mV s <sup>-1</sup> in 0.1 M H <sub>2</sub> SO <sub>4</sub> | Catal. Today 2016, 262, 170–180 <sup>56</sup>             |
| Na-a/c-RuO <sub>2</sub>                          | 0.383                                                                   | 10 mA cm <sup>-2</sup> for 24 h in 0.1 M HClO <sub>4</sub>                                             | Angew. Chem. Int. Ed, 2021, 60, 18821–18829 <sup>22</sup> |
| Y <sub>2</sub> Ru <sub>2</sub> O <sub>7</sub>    | ~0.102                                                                  | at 1.56 V for 10 h in 0.1 M HClO <sub>4</sub>                                                          | ACS Catal. 2020, 10, 12182–12196 <sup>57</sup>            |
| Gd <sub>2</sub> Ru <sub>2</sub> O <sub>7</sub>   | ~0.156                                                                  |                                                                                                        |                                                           |
| Bi <sub>2</sub> Ru <sub>2</sub> O <sub>7</sub>   | ~0.168                                                                  |                                                                                                        |                                                           |
| Nd <sub>2</sub> Ru <sub>2</sub> O <sub>7</sub>   | ~0.812                                                                  |                                                                                                        |                                                           |
| RuO <sub>2</sub> -WC                             | 0.516                                                                   | at 1.55 V for 10 h in 0.5 M H <sub>2</sub> SO <sub>4</sub>                                             | Angew. Chem. Int. Ed, 2022, 61, e202202519 <sup>11</sup>  |
| Li <sub>x</sub> RuO <sub>2</sub>                 | 0.229                                                                   | at 10 mA cm <sup>-2</sup> for 50 h in 0.5 M H <sub>2</sub> SO <sub>4</sub>                             | Nat. Commun. 2022, 13, 3784 <sup>14</sup>                 |
| RuNi <sub>2</sub> @G-250                         | 0.326                                                                   | at 10 mA cm <sup>-2</sup> for 24 h in 0.5 M H <sub>2</sub> SO <sub>4</sub>                             | Adv. Mater. 2020, 32, 1908126 <sup>35</sup>               |

**Supplementary Table 6** | Adsorption energies of reaction intermediates.

|                                    | $\Delta\text{OH}$<br>(eV) | $\Delta\text{O}$<br>(eV) | $\Delta\text{OH}\dots\text{OH}$<br>for OPM_2 (eV) | $\Delta\text{OOH}$<br>(eV) | $\Delta\text{O}\dots\text{OH}$<br>for OPM_1 (eV) | $\Delta\text{H}$<br>for LOM (eV) | $\Delta G_{\text{max}}$<br>(eV) | OP<br>(V) |
|------------------------------------|---------------------------|--------------------------|---------------------------------------------------|----------------------------|--------------------------------------------------|----------------------------------|---------------------------------|-----------|
| RuO <sub>2</sub>                   | 0.82                      | 1.79                     | 1.41                                              | 3.89                       | 2.44                                             | 1.13                             | 2.10                            | 0.87      |
| ZnRuO <sub>2</sub>                 | 1.01                      | 1.89                     | 1.58                                              | 3.99                       | 3.80                                             | 0.53                             | 1.91                            | 0.68      |
| ZnRuO <sub>2</sub> _V <sub>O</sub> | 0.88                      | 1.73                     | 1.55                                              | 3.60                       | 3.57                                             | 1.54                             | 1.84                            | 0.61      |
| RuO <sub>2</sub> _V <sub>O</sub>   | 0.70                      | 1.64                     |                                                   | 3.92                       |                                                  |                                  | 2.28                            | 1.05      |

**Supplementary Table 7** | Mechanisms of OER process.

| AEM                                                           | OPM                                                                                             | LOM                                                                    |
|---------------------------------------------------------------|-------------------------------------------------------------------------------------------------|------------------------------------------------------------------------|
| $\text{H}_2\text{O} + * \rightarrow *OH + \text{H}^+ + e^-$   | $\text{H}_2\text{O} + * \rightarrow *OH + \text{H}^+ + e^-$                                     | $\text{H}_2\text{O} + * \rightarrow *OH + \text{H}^+ + e^-$            |
| $*OH \rightarrow *O + \text{H}^+ + e^-$                       | $*OH \rightarrow *O + \text{H}^+ + e^-$                                                         | $*OH \rightarrow *O + \text{H}^+ + e^-$                                |
| $*O + \text{H}_2\text{O} \rightarrow *OOH + \text{H}^+ + e^-$ | $*O + \text{H}_2\text{O} \rightarrow *O\dots*OH + \text{H}^+ + e^- \dots\dots\dots\text{OPM}_1$ | $*O + \text{M-O} \rightarrow \text{O}_2 + *$                           |
| $*OOH \rightarrow \text{O}_2 + \text{H}^+ + e^-$              | $*OH + \text{H}_2\text{O} \rightarrow *OH\dots*OH + \text{H}^+ + e^-$                           | $\text{M-Vac} + \text{H}_2\text{O} \rightarrow *OH + \text{H}^+ + e^-$ |
|                                                               | $*OH\dots*OH \rightarrow *O\dots*OH + \text{H}^+ + e^- \dots\dots\dots\text{OPM}_2$             | $*OH \rightarrow \text{M-O} + \text{H}^+ + e^-$                        |
|                                                               | $*O\dots*OH \rightarrow *O\dots*O + \text{H}^+ + e^-$                                           |                                                                        |
|                                                               | $*O\dots*O \rightarrow \text{O}_2 + *$                                                          |                                                                        |

## Supplementary references

1. Jo, H. C.; Kim, K. M.; Cheong, H.; Lee, S.-H.; Deb, S. K. In situ Raman spectroscopy of RuO<sub>2</sub>·xH<sub>2</sub>O. *Electrochem. Solid-State Lett.* **8**, E39–E41 (2005).
2. Arikawa, T.; Takasu, Y.; Murakami, Y.; Asakura, K.; Iwasawa, Y. Characterization of the structure of RuO<sub>2</sub>–IrO<sub>2</sub>/Ti electrodes by EXAFS. *J. Phys. Chem. B* **102**, 3736–3741 (1998).
3. Lin, C.; Li, J.-L.; Li, X.; Yang, S.; Luo, W.; Zhang, Y.; Kim, S.-H.; Kim, D.-H.; Shinde, S. S.; Li, Y.-F.; Liu, Z.-P.; Jiang, Z.; Lee, J.-H., In-situ reconstructed Ru atom array on  $\alpha$ -MnO<sub>2</sub> with enhanced performance for acidic water oxidation. *Nat. Catal.* **4**, 1012–1023 (2021).
4. Viswanathan, V.; Hansen, H. A.; Nørskov, J. K. Selective electrochemical generation of hydrogen peroxide from water oxidation. *J. Phys. Chem. Lett.* **6**, 4224–4228 (2015).
5. Dousikou, M. F.; Koupparis, M. A.; Efstathiou, C. E. Determination of catalase-like activity in plants based on the amperometric monitoring of hydrogen peroxide consumption using a carbon paste electrode modified with ruthenium(IV) oxide. *Phytochem. Anal.* **17**, 255–261 (2006).
6. Gancs, L.; Hakim, N.; Hult, B.; Mukerjee, S. Dissolution of Ru from PtRu electrocatalysts and its consequences in DMFCs. *ECS Trans.* **3**, 607 (2006).
7. Zagalskaya, A.; Alexandrov, V. Role of defects in the interplay between adsorbate evolving and lattice oxygen mechanisms of the oxygen evolution reaction in RuO<sub>2</sub> and IrO<sub>2</sub>. *ACS Catal.* **10**, 3650–3657 (2020).
8. Lin, C.; Li, J.-L.; Li, X.; Yang, S.; Luo, W.; Zhang, Y.; Kim, S.-H.; Kim, D.-H.; Shinde, S. S.; Li, Y.-F.; Liu, Z.-P.; Jiang, Z.; Lee, J.-H. In-situ reconstructed Ru atom array on  $\alpha$ -MnO<sub>2</sub> with enhanced performance for acidic water oxidation. *Nat. Catal.* **4**, 1012–1023 (2021).
9. Zhou, G.; Wang, P.; Hu, B.; Shen, X.; Liu, C.; Tao, W.; Huang, P.; Liu, L. Spin-related symmetry breaking induced by half-disordered hybridization in Bi<sub>1-x</sub>Er<sub>2-x</sub>Ru<sub>2</sub>O<sub>7</sub> pyrochlores for acidic oxygen evolution. *Nat. Commun.* **13**, 4106 (2022).
10. Wang, J.; Cheng, C.; Yuan, Q.; Yang, H.; Meng, F.; Zhang, Q.; Gu, L.; Cao, J.; Li, L.; Haw, S.-C.; Shao, Q.; Zhang, L.; Cheng, T.; Jiao, F.; Huang, X. Exceptionally active and stable RuO<sub>2</sub> with interstitial carbon for water oxidation in acid. *Chem* **8**, 1673–1687 (2022).
11. Sun, S.-C.; Jiang, H.; Chen, Z.-Y.; Chen, Q.; Ma, M.-Y.; Zhen, L.; Song, B.; Xu, C.-Y., Bifunctional WC-supported RuO<sub>2</sub> nanoparticles for robust water splitting in acidic media. *Angew. Chem. Int. Ed.* **61**, e202202519 (2022).
12. Wang, K.; Wang, Y.; Yang, B.; Li, Z.; Qin, X.; Zhang, Q.; Lei, L.; Qiu, M.; Wu, G.; Hou, Y., Highly active ruthenium sites stabilized by modulating electron-feeding for sustainable acidic oxygen-evolution electrocatalysis. *Energy Environ. Sci.* **15**, 2356–2365 (2022).
13. Wang, J.; Yang, H.; Li, F.; Li, L.; Wu, J.; Liu, S.; Cheng, T.; Xu, Y.; Shao, Q.; Huang, X., Single-site Pt-doped RuO<sub>2</sub> hollow nanospheres with interstitial C for high-performance acidic overall water splitting. *Sci. Adv.* **8**, eabl9271 (2022).
14. Qin, Y.; Yu, T.; Deng, S.; Zhou, X.-Y.; Lin, D.; Zhang, Q.; Jin, Z.; Zhang, D.; He, Y.-B.; Qiu, H.-J.; He, L.; Kang, F.; Li, K.; Zhang, T.-Y., RuO<sub>2</sub> electronic structure and lattice strain dual engineering for enhanced acidic oxygen evolution reaction performance. *Nat. Commun.* **13**, 3784 (2022).
15. Yao, Q.; Yu, Z.; Chu, Y.-H.; Lai, Y.-H.; Chan, T.-S.; Xu, Y.; Shao, Q.; Huang, X. S Incorporated RuO<sub>2</sub>-based nanorings for active and stable water oxidation in acid. *Nano Res.* **15**, 3964–3970 (2022).
16. An, L.; Yang, F.; Fu, C.; Cai, X.; Shen, S.; Xia, G.; Li, J.; Du, Y.; Luo, L.; Zhang, J. A functionally stable RuMn electrocatalyst for oxygen evolution reaction in acid. *Adv. Funct. Mater.* **32**, 2200131 (2022).
17. Wang, X.; Wan, X.; Qin, X.; Chen, C.; Qian, X.; Guo, Y.; Xu, Q.; Cai, W.-B.; Yang, H.; Jiang, K. Electronic structure modulation of RuO<sub>2</sub> by TiO<sub>2</sub> enriched with oxygen vacancies to boost acidic O<sub>2</sub> evolution. *ACS Catal.* **12**, 9437–9445 (2022).
18. Huang, R.; Wen, Y.; Peng, H.; Zhang, B. Improved kinetics of OER on Ru-Pb binary electrocatalyst by decoupling proton-electron transfer. *Chin. J. Catal.* **43**, 130–138 (2022).
19. Zhou, Y.-N.; Yu, N.; Lv, Q.-X.; Liu, B.; Dong, B.; Chai, Y.-M. Surface evolution of Zn doped-RuO<sub>2</sub> under different etching

- methods towards acidic oxygen evolution. *J. Mater. Chem. A* **10**, 16193–16203 (2022).
20. Chen, S.; Wang, C.; Gao, F.; Yang, Y.; Huang, M.; Tong, H.; Cheng, Z.; Wang, P.; Wang, P.; Tu, J.; Zeng, X.; Chen, Q., An indium-induced-synthesis  $\text{In}_{0.17}\text{Ru}_{0.83}\text{O}_2$  nanoribbon as highly active electrocatalyst for oxygen evolution in acidic media at high current densities above  $400 \text{ mA cm}^{-2}$ . *J. Mater. Chem. A* **10**, 3722–3731 (2022).
21. Li, L.; Bu, L.; Huang, B.; Wang, P.; Shen, C.; Bai, S.; Chan, T.-S.; Shao, Q.; Hu, Z.; Huang, X., Compensating electronic effect enables fast site-to-site electron transfer over ultrathin RuMn nanosheet branches toward highly electroactive and stable water splitting. *Adv. Mater.* **33**, 2105308 (2021).
22. Zhang, L.; Zhang, H.; Liu, H.; Kim, M. G.; Yang, D.; Liu, S.; Liu, X.; Cho, J., Sodium-decorated amorphous/crystalline  $\text{RuO}_2$  with rich oxygen vacancies: A robust pH-universal oxygen evolution electrocatalyst. *Angew. Chem. Int. Ed.* **60**, 18821–18829 (2021).
23. Zhu, J.; Guo, Y.; Liu, F.; Xu, H.; Gong, L.; Shi, W.; Chen, D.; Wang, P.; Yang, Y.; Zhang, C.; Wu, J.; Luo, J.; Mu, S., Regulative electronic states around ruthenium/ruthenium disulphide heterointerfaces for efficient water splitting in acidic media. *Angew. Chem. Int. Ed.* **60**, 12328–12334 (2021).
24. Wen, Y.; Chen, P.; Wang, L.; Li, S.; Wang, Z.; Abed, J.; Mao, X.; Min, Y.; Dinh, C. T.; Luna, P. D.; Huang, R.; Zhang, L.; Wang, L.; Wang, L.; Nielsen, R. J.; Li, H.; Zhuang, T.; Ke, C.; Voznyy, O.; Hu, Y.; Li, Y.; Goddard Iii, W. A.; Zhang, B.; Peng, H.; Sargent, E. H., Stabilizing highly active Ru sites by suppressing lattice oxygen participation in acidic water oxidation. *J. Am. Chem. Soc.* **143**, 6482–6490 (2021).
25. Harzandi, A. M.; Shadman, S.; Nissimagoudar, A. S.; Kim, D. Y.; Lim, H.-D.; Lee, J. H.; Kim, M. G.; Jeong, H. Y.; Kim, Y.; Kim, K. S., Ruthenium core-shell engineering with nickel single atoms for selective oxygen evolution via nondestructive mechanism. *Adv. Energy Mater.* **11**, 2003448 (2021).
26. Zhang, N.; Wang, C.; Chen, J.; Hu, C.; Ma, J.; Deng, X.; Qiu, B.; Cai, L.; Xiong, Y.; Chai, Y., Metal substitution steering electron correlations in pyrochlore ruthenates for efficient acidic water oxidation. *ACS Nano* **15**, 8537–8548 (2021).
27. Xu, J.; Li, J.; Lian, Z.; Araujo, A.; Li, Y.; Wei, B.; Yu, Z.; Bondarchuk, O.; Amorim, I.; Tileli, V.; Li, B.; Liu, L., Atomic-step enriched ruthenium-iridium nanocrystals anchored homogeneously on MOF-derived support for efficient and stable oxygen evolution in acidic and neutral media. *ACS Catal.* **11**, 3402–3413 (2021).
28. Chen, L.; Li, Y.; Liang, X., Ar/H<sub>2</sub>/O<sub>2</sub>-controlled growth thermodynamics and kinetics to create zero-, one-, and two-dimensional ruthenium nanocrystals towards acidic overall water splitting. *Adv. Funct. Mater.* **31**, 2007344 (2021).
29. Xue, Y.; Fang, J.; Wang, X.; Xu, Z.; Zhang, Y.; Lv, Q.; Liu, M.; Zhu, W.; Zhuang, Z., Sulfate-functionalized  $\text{RuFeO}_x$  as highly efficient oxygen evolution reaction electrocatalyst in acid. *Adv. Funct. Mater.* **31**, 2101405 (2021).
30. Zhang, H.; Wu, B.; Su, J.; Zhao, K.; Chen, L., MOF-derived zinc-doped ruthenium oxide hollow nanorods as highly active and stable electrocatalysts for oxygen evolution in acidic media. *ChemNanoMat* **7**, 117–121 (2021).
31. Yao, Q.; Huang, B.; Xu, Y.; Li, L.; Shao, Q.; Huang, X., A chemical etching strategy to improve and stabilize  $\text{RuO}_2$ -based nanoassemblies for acidic oxygen evolution. *Nano Energy* **84**, 105909 (2021).
32. Zhao, Z. L.; Wang, Q.; Huang, X.; Feng, Q.; Gu, S.; Zhang, Z.; Xu, H.; Zeng, L.; Gu, M.; Li, H., Boosting oxygen evolution reaction using defect-rich ultra-thin ruthenium oxide nanosheets in acidic media. *Energy Environ. Sci.* **13**, 5143–5151 (2020).
33. Kuznetsov, D. A.; Naeem, M. A.; Kumar, P. V.; Abdala, P. M.; Fedorov, A.; Muller, C. R., Tailoring lattice oxygen binding in ruthenium pyrochlores to enhance oxygen evolution activity. *J. Am. Chem. Soc.* **142**, 7883–7888 (2020).
34. Hao, S.; Liu, M.; Pan, J.; Liu, X.; Tan, X.; Xu, N.; He, Y.; Lei, L.; Zhang, X., Dopants fixation of ruthenium for boosting acidic oxygen evolution stability and activity. *Nat Commun.* **11**, 5368 (2020).
35. Cui, X.; Ren, P.; Ma, C.; Zhao, J.; Chen, R.; Chen, S.; Rajan, N. P.; Li, H.; Yu, L.; Tian, Z.; Deng, D., Robust interface Ru centers for high-performance acidic oxygen evolution. *Adv. Mater.* **32**, 1908126 (2020).
36. Chen, D.; Liu, T.; Wang, P.; Zhao, J.; Zhang, C.; Cheng, R.; Li, W.; Ji, P.; Pu, Z.; Mu, S., Ionothermal route to phase-pure  $\text{RuB}_2$  catalysts for efficient oxygen evolution and water splitting in acidic media. *ACS Energy Lett.* **5**, 2909–2915 (2020).
37. Chen, S.; Huang, H.; Jiang, P.; Yang, K.; Diao, J.; Gong, S.; Liu, S.; Huang, M.; Wang, H.; Chen, Q., Mn-doped  $\text{RuO}_2$



- nanocrystals as highly active electrocatalysts for enhanced oxygen evolution in acidic media. *ACS Catal.* **10**, 1152–1160 (2020).
38. Xu, J.; Lian, Z.; Wei, B.; Li, Y.; Bondarchuk, O.; Zhang, N.; Yu, Z.; Araujo, A.; Amorim, I.; Wang, Z.; Li, B.; Liu, L., Strong electronic coupling between ultrafine iridium–ruthenium nanoclusters and conductive, acid-stable tellurium nanoparticle support for efficient and durable oxygen evolution in acidic and neutral media. *ACS Catal.* **10**, 3571–3579 (2020).
  39. Wang, J.-Q.; Xi, C.; Wang, M.; Shang, L.; Mao, J.; Dong, C.-K.; Liu, H.; Kulinich, S. A.; Du, X.-W., Laser-generated grain boundaries in ruthenium nanoparticles for boosting oxygen evolution reaction. *ACS Catal.* **10**, 12575–12581 (2020).
  40. Yao, Y.; Hu, S.; Chen, W.; Huang, Z.-Q.; Wei, W.; Yao, T.; Liu, R.; Zang, K.; Wang, X.; Wu, G.; Yuan, W.; Yuan, T.; Zhu, B.; Liu, W.; Li, Z.; He, D.; Xue, Z.; Wang, Y.; Zheng, X.; Dong, J.; Chang, C.-R.; Chen, Y.; Hong, X.; Luo, J.; Wei, S.; Li, W.-X.; Strasser, P.; Wu, Y.; Li, Y., Engineering the electronic structure of single atom Ru sites via compressive strain boosts acidic water oxidation electrocatalysis. *Nat. Catal.* **2**, 304–313 (2019).
  41. Yao, Q.; Huang, B.; Zhang, N.; Sun, M.; Shao, Q.; Huang, X., Channel-rich RuCu nanosheets for pH-universal overall water splitting electrocatalysis. *Angew. Chem. Int. Ed.* **58**, 13983–13988 (2019).
  42. Shan, J.; Ling, T.; Davey, K.; Zheng, Y.; Qiao, S.-Z., Transition-metal-doped RuIr bifunctional nanocrystals for overall water splitting in acidic environments. *Adv. Mater.* **31**, 1900510 (2019).
  43. Ge, R.; Li, L.; Su, J.; Lin, Y.; Tian, Z.; Chen, L., Ultrafine defective RuO<sub>2</sub> electrocatalyst integrated on carbon cloth for robust water oxidation in acidic media. *Adv. Energy Mater.* **9**, 1901313 (2019).
  44. Laha, S.; Lee, Y.; Podjaski, F.; Weber, D.; Duppel, V.; Schoop, L. M.; Pielnhofer, F.; Scheurer, C.; Müller, K.; Starke, U.; Reuter, K.; Lotsch, B. V., Ruthenium oxide nanosheets for enhanced oxygen evolution catalysis in acidic medium. *Adv. Energy Mater.* **9**, 1803795 (2019).
  45. Lin, Y.; Tian, Z.; Zhang, L.; Ma, J.; Jiang, Z.; Deibert, B. J.; Ge, R.; Chen, L., Chromium-ruthenium oxide solid solution electrocatalyst for highly efficient oxygen evolution reaction in acidic media. *Nat. Commun.* **10**, 162 (2019).
  46. Miao, X.; Zhang, L.; Wu, L.; Hu, Z.; Shi, L.; Zhou, S., Quadruple perovskite ruthenate as a highly efficient catalyst for acidic water oxidation. *Nat. Commun.* **10**, 3809 (2019).
  47. Retuerto, M.; Pascual, L.; Calle-Vallejo, F.; Ferrer, P.; Gianolio, D.; Pereira, A. G.; García, Á.; Torrero, J.; Fernández-Díaz, M. T.; Bencok, P.; Peña, M. A.; Fierro, J. L. G.; Rojas, S., Na-doped ruthenium perovskite electrocatalysts with improved oxygen evolution activity and durability in acidic media. *Nat. Commun.* **10**, 2041 (2019).
  48. Wang, J.; Han, L.; Huang, B.; Shao, Q.; Xin, H. L.; Huang, X., Amorphization activated ruthenium-tellurium nanorods for efficient water splitting. *Nat. Commun.* **10**, 5692 (2019).
  49. Cao, L.; Luo, Q.; Chen, J.; Wang, L.; Lin, Y.; Wang, H.; Liu, X.; Shen, X.; Zhang, W.; Liu, W.; Qi, Z.; Jiang, Z.; Yang, J.; Yao, T., Dynamic oxygen adsorption on single-atomic ruthenium catalyst with high performance for acidic oxygen evolution reaction. *Nat. Commun.* **10**, 4849 (2019).
  50. Yu, J.; Li, G.; Liu, H.; Zhao, L.; Wang, A.; Liu, Z.; Li, H.; Liu, H.; Hu, Y.; Zhou, W., Ru–Ru<sub>2</sub>P@NPC and NPC@RuO<sub>2</sub> synthesized via environment-friendly and solid-phase phosphating process by saccharomycetes as N/P sources and carbon template for overall water splitting in acid electrolyte. *Adv. Funct. Mater.* **29**, 1901154 (2019).
  51. Su, J.; Ge, R.; Jiang, K.; Dong, Y.; Hao, F.; Tian, Z.; Chen, G.; Chen, L., Assembling ultrasmall copper-doped ruthenium oxide nanocrystals into hollow porous polyhedra: Highly robust electrocatalysts for oxygen evolution in acidic media. *Adv. Mater.* **30**, 1801351 (2018).
  52. Gloag, L.; Benedetti, T. M.; Cheong, S.; Marjo, C. E.; Gooding, J. J.; Tilley, R. D., Cubic-core hexagonal-branch mechanism to synthesize bimetallic branched and faceted Pd–Ru nanoparticles for oxygen evolution reaction electrocatalysis. *J. Am. Chem. Soc.* **140**, 12760–12764 (2018).
  53. Gloag, L.; Benedetti, T. M.; Cheong, S.; Li, Y.; Chan, X.-H.; Lacroix, L.-M.; Chang, S. L. Y.; Arenal, R.; Florea, I.; Barron, H.; Barnard, A. S.; Henning, A. M.; Zhao, C.; Schuhmann, W.; Gooding, J. J.; Tilley, R. D., Three-dimensional branched and faceted gold–ruthenium nanoparticles: Using nanostructure to improve stability in oxygen evolution electrocatalysis. *Angew. Chem. Int. Ed.* **57**, 10241–10245 (2018).

54. Shan, J.; Guo, C.; Zhu, Y.; Chen, S.; Song, L.; Jaroniec, M.; Zheng, Y.; Qiao, S.-Z., Charge-redistribution-enhanced nanocrystalline Ru@IrO<sub>3</sub> electrocatalysts for oxygen evolution in acidic media. *Chem* **5**, 445–459 (2019).
55. Kim, J.; Shih, P.-C.; Qin, Y.; Al-Bardan, Z.; Sun, C.-J.; Yang, H., A porous pyrochlore Y<sub>2</sub>[Ru<sub>1.6</sub>Y<sub>0.4</sub>]O<sub>7-δ</sub> electrocatalyst for enhanced performance towards the oxygen evolution reaction in acidic media. *Angew. Chem. Int. Ed.* **57**, 13877–13881 (2018).
56. Cherevko, S.; Geiger, S.; Kasian, O.; Kulyk, N.; Grote, J.-P.; Savan, A.; Shrestha, B. R.; Merzlikin, S.; Breitbach, B.; Ludwig, A.; Mayrhofer, K. J. J. Oxygen and hydrogen evolution reactions on Ru, RuO<sub>2</sub>, Ir, and IrO<sub>2</sub> thin film electrodes in acidic and alkaline electrolytes: A comparative study on activity and stability. *Catal. Today* **262**, 170-180 (2016).
57. Hubert, M. A.; Patel, A. M.; Gallo, A.; Liu, Y.; Valle, E.; Ben-Naim, M.; Sanchez, J.; Sokaras, D.; Sinclair, R.; Nørskov, J. K.; King, L. A.; Bajdich, M.; Jaramillo, T. F. Acidic oxygen evolution reaction activity–stability relationships in Ru-based pyrochlores. *ACS Catal.* **10**, 12182–12196 (2020).
